# Supplementary material for: Uncommon Capnosane Diterpenes with Neuroprotective Potential from South China Sea Soft Coral Sarcophyton boettgeri
Source: MDPI journal article supplement (doi:10.3390/md20100602), 2022-09-25
Supplement: s1 [file s1]

## Supporting Information

### **Uncommon Capnosane Diterpenes with Neuroprotective Potential from A New Collection of South China Sea Soft Coral *Sarcophyton boettgeri***

Ye-Qing Du<sup>1,2,†</sup>, Jing Chen<sup>1,2,†</sup>, Meng-Jun Wu<sup>2,6</sup>, Hai-Yan Zhang<sup>1,2,\*</sup>, Lin-Fu Liang<sup>3,\*</sup> and Yue-Wei Guo<sup>1,2,4,5,6,\*</sup>

<sup>1</sup> School of Chinese Materia Medica, Nanjing University of Chinese Medicine, Nanjing 210023, China

<sup>2</sup> State Key Laboratory of Drug Research, Shanghai Institute of Materia Medica, Chinese Academy of Sciences, 555, Zu Chong Zhi Road, Zhangjiang Hi-Tech Park, Shanghai 201203, China

<sup>3</sup> College of Materials Science and Engineering, Central South University of Forestry and Technology, 498 South Shaoshan Road, Changsha 410004, China

<sup>4</sup> Shandong Laboratory of Yantai Drug Discovery, Bohai rim Advanced Research Institute for Drug Discovery, Yantai 264117, China

<sup>5</sup> Open Studio for Druggability Research of Marine Natural Products, Pilot National Laboratory for Marine Science and Technology (Qingdao), 1 Wenhai Road, Aoshanwei, Jimo, Qingdao 266237, China

<sup>6</sup> Collaborative Innovation Center of Yangtze River Delta Region Green Pharmaceuticals and College of Pharmaceutical Science, Zhejiang University of Technology, Hangzhou 310014, China

\* Correspondence: hzhang@sim.ac.cn (H.-Y. Z.); lianglinfu@csuft.edu.cn (L.-F.L.); ywguo@sim.ac.cn (Y.-W.G.); Tel.: +86-21-50805813 (Y.-W.G.)

† These authors contributed equally to this work

## Table of contents

|                    |                                                                                          |
|--------------------|------------------------------------------------------------------------------------------|
| <b>Figure S1.</b>  | <b><sup>1</sup>H NMR spectrum of <b>1</b> (600MHz, CDCl<sub>3</sub>)</b>                 |
| <b>Figure S2.</b>  | <b><sup>13</sup>C NMR spectrum of <b>1</b> (150 MHz, CDCl<sub>3</sub>)</b>               |
| <b>Figure S3.</b>  | <b>DEPT spectrum of <b>1</b> (150 MHz, CDCl<sub>3</sub>)</b>                             |
| <b>Figure S4.</b>  | <b><sup>1</sup>H-<sup>1</sup>H COSY spectrum of <b>1</b> (600 MHz, CDCl<sub>3</sub>)</b> |
| <b>Figure S5.</b>  | <b>HSQC spectrum of <b>1</b> (600 MHz, CDCl<sub>3</sub>)</b>                             |
| <b>Figure S6.</b>  | <b>HMBC spectrum of <b>1</b> (600 MHz, CDCl<sub>3</sub>)</b>                             |
| <b>Figure S7.</b>  | <b>NOESY spectrum of <b>1</b> (600 MHz, CDCl<sub>3</sub>)</b>                            |
| <b>Figure S8.</b>  | <b>IR spectrum of <b>1</b></b>                                                           |
| <b>Figure S9.</b>  | <b>HRESIMS spectrum of <b>1</b></b>                                                      |
| <b>Figure S10.</b> | <b><sup>1</sup>H NMR spectrum of <b>2</b> (600MHz, CDCl<sub>3</sub>)</b>                 |
| <b>Figure S11.</b> | <b><sup>13</sup>C NMR spectrum of <b>2</b> (150 MHz, CDCl<sub>3</sub>)</b>               |
| <b>Figure S12.</b> | <b>DEPT spectrum of <b>2</b> (150 MHz, CDCl<sub>3</sub>)</b>                             |
| <b>Figure S13.</b> | <b><sup>1</sup>H-<sup>1</sup>H COSY spectrum of <b>2</b> (600 MHz, CDCl<sub>3</sub>)</b> |
| <b>Figure S14.</b> | <b>HSQC spectrum of <b>2</b> (600 MHz, CDCl<sub>3</sub>)</b>                             |
| <b>Figure S15.</b> | <b>HMBC spectrum of <b>2</b> (600 MHz, CDCl<sub>3</sub>)</b>                             |
| <b>Figure S16.</b> | <b>NOESY spectrum of <b>2</b> (600 MHz, CDCl<sub>3</sub>)</b>                            |
| <b>Figure S17.</b> | <b>IR spectrum of <b>2</b></b>                                                           |
| <b>Figure S18.</b> | <b>HRESIMS spectrum of <b>2</b></b>                                                      |
| <b>Figure S19.</b> | <b><sup>1</sup>H NMR spectrum of <b>3</b> (600MHz, CDCl<sub>3</sub>)</b>                 |
| <b>Figure S20.</b> | <b><sup>13</sup>C NMR spectrum of <b>3</b> (150 MHz, CDCl<sub>3</sub>)</b>               |
| <b>Figure S21.</b> | <b>DEPT spectrum of <b>3</b> (150 MHz, CDCl<sub>3</sub>)</b>                             |
| <b>Figure S22.</b> | <b><sup>1</sup>H-<sup>1</sup>H COSY spectrum of <b>3</b> (600 MHz, CDCl<sub>3</sub>)</b> |
| <b>Figure S23.</b> | <b>HSQC spectrum of <b>3</b> (600MHz, CDCl<sub>3</sub>)</b>                              |
| <b>Figure S24.</b> | <b>HMBC spectrum of <b>3</b> (600 MHz, CDCl<sub>3</sub>)</b>                             |
| <b>Figure S25.</b> | <b>NOESY spectrum of <b>3</b> (600MHz, CDCl<sub>3</sub>)</b>                             |
| <b>Figure S26.</b> | <b>IR spectrum of <b>3</b></b>                                                           |
| <b>Figure S27.</b> | <b>HRESIMR spectrum of <b>3</b></b>                                                      |
| <b>Figure S28.</b> | <b><sup>1</sup>H NMR spectrum of <b>4</b> (600MHz, CDCl<sub>3</sub>)</b>                 |
| <b>Figure S29.</b> | <b><sup>13</sup>C NMR spectrum of <b>4</b> (150 MHz, CDCl<sub>3</sub>)</b>               |
| <b>Figure S30.</b> | <b>DEPT spectrum of <b>4</b> (150 MHz, CDCl<sub>3</sub>)</b>                             |
| <b>Figure S31.</b> | <b><sup>1</sup>H-<sup>1</sup>H COSY spectrum of <b>4</b> (600 MHz, CDCl<sub>3</sub>)</b> |
| <b>Figure S32.</b> | <b>HSQC spectrum of <b>4</b> (600 MHz, CDCl<sub>3</sub>)</b>                             |
| <b>Figure S33.</b> | <b>HMBC spectrum of <b>4</b> (600 MHz, CDCl<sub>3</sub>)</b>                             |
| <b>Figure S34.</b> | <b>NOESY spectrum of <b>4</b> (600 MHz, CDCl<sub>3</sub>)</b>                            |
| <b>Figure S35.</b> | <b>IR spectrum of <b>4</b></b>                                                           |
| <b>Figure S36.</b> | <b>HRESIMR spectrum of <b>4</b></b>                                                      |
| <b>Figure S37.</b> | <b><sup>1</sup>H NMR spectrum of <b>5</b> (600MHz, CDCl<sub>3</sub>)</b>                 |
| <b>Figure S38.</b> | <b><sup>13</sup>C NMR spectrum of <b>5</b> (150 MHz, CDCl<sub>3</sub>)</b>               |
| <b>Figure S39.</b> | <b>DEPT spectrum of <b>5</b> (150 MHz, CDCl<sub>3</sub>)</b>                             |
| <b>Figure S40.</b> | <b><sup>1</sup>H-<sup>1</sup>H COSY spectrum of <b>5</b> (600 MHz, CDCl<sub>3</sub>)</b> |
| <b>Figure S41.</b> | <b>HSQC spectrum of <b>5</b> (600 MHz, CDCl<sub>3</sub>)</b>                             |
| <b>Figure S42.</b> | <b>HMBC spectrum of <b>5</b> (600 MHz, CDCl<sub>3</sub>)</b>                             |

**Figure S43.** NOESY spectrum of **5** (600 MHz, CDCl<sub>3</sub>)

**Figure S44.** IR spectrum of **5**

**Figure S45.** HREIMR spectrum of **5**

**Figure S46.** Regression analysis of experimental vs calculated <sup>13</sup>C NMR chemical shifts of (3*R*\*,4*R*\*,7*R*\*,11*S*\*,12*S*\*)-**1a**, (3*R*\*,4*R*\*,7*S*\*,11*S*\*,12*S*\*)-**1b** at the PCM/mPW1PW91/6-31+G\*\* level using DP4+ method

**Figure S47.** Regression analysis of experimental vs calculated <sup>13</sup>C NMR chemical shifts of (3*R*\*,4*R*\*,7*R*\*,11*S*\*,12*S*\*)-**2a**, (3*R*\*,4*R*\*,7*S*\*,11*S*\*,12*S*\*)-**2b** at the PCM/mPW1PW91/6-31+G\*\* level using DP4+ method

**Figure S48.** Regression analysis of experimental vs calculated <sup>13</sup>C NMR chemical shifts of (3*R*\*,4*R*\*,7*R*\*,8*R*\*)-**6a**, (3*R*\*,4*R*\*,7*S*\*,8*R*\*)-**6b** at the PCM/mPW1PW91/6-31+G\*\* level using DP4+ method

**Figure S49.** Regression analysis of experimental vs calculated <sup>13</sup>C NMR chemical shifts of (3*R*\*,4*R*\*,7*S*\*,11*S*\*,12*S*\*)-**7a**, (3*R*\*,4*R*\*,7*R*\*,11*S*\*,12*S*\*)-**7b** at the PCM/mPW1PW91/6-31+G\*\* level using DP4+ method

**Table S1** Crystal data and structure refinement for compound **1**

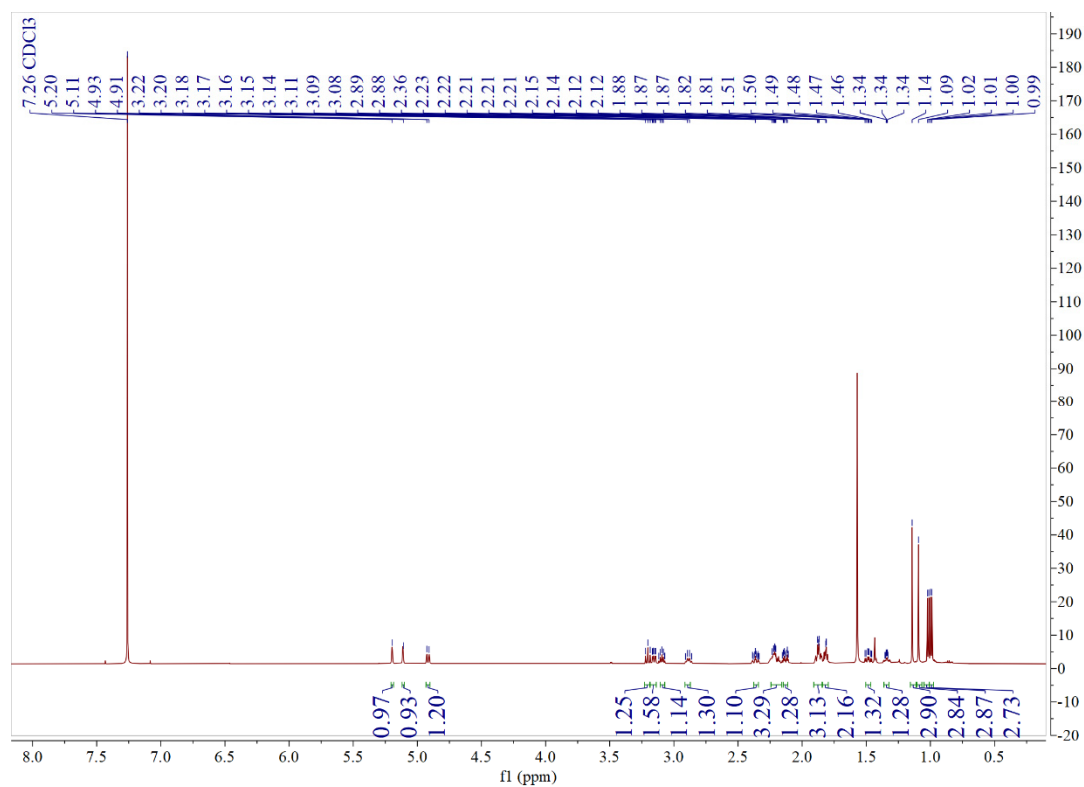

**Figure S1.** <sup>1</sup>H NMR spectrum of **1** (600MHz, CDCl<sub>3</sub>)

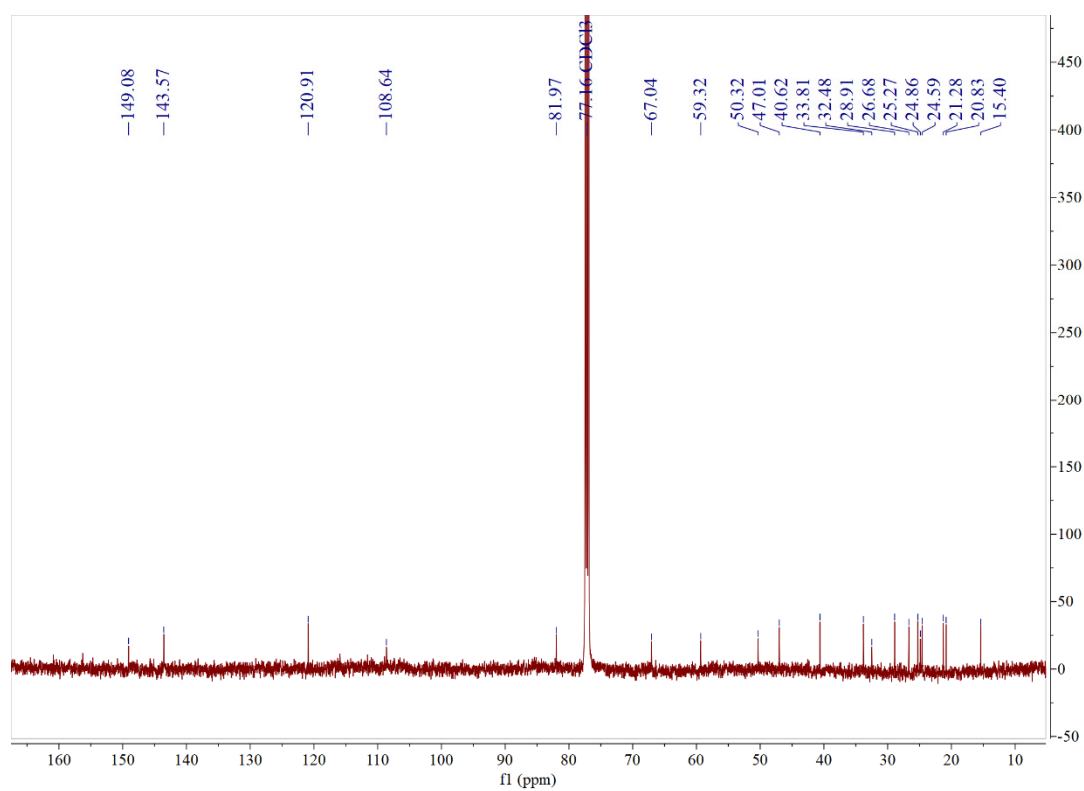

**Figure S2.** <sup>13</sup>C NMR spectrum of **1** (150 MHz, CDCl<sub>3</sub>)

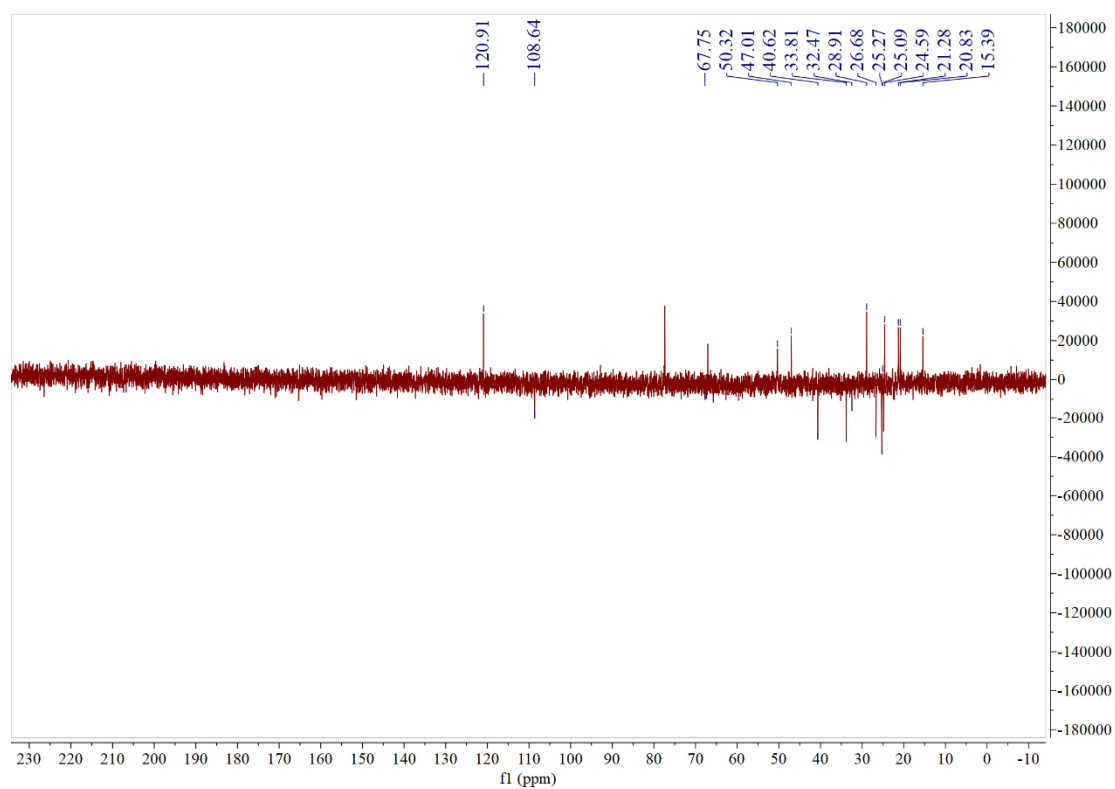

**Figure S3.** DEPT spectrum of **1** (150 MHz,  $\text{CDCl}_3$ )

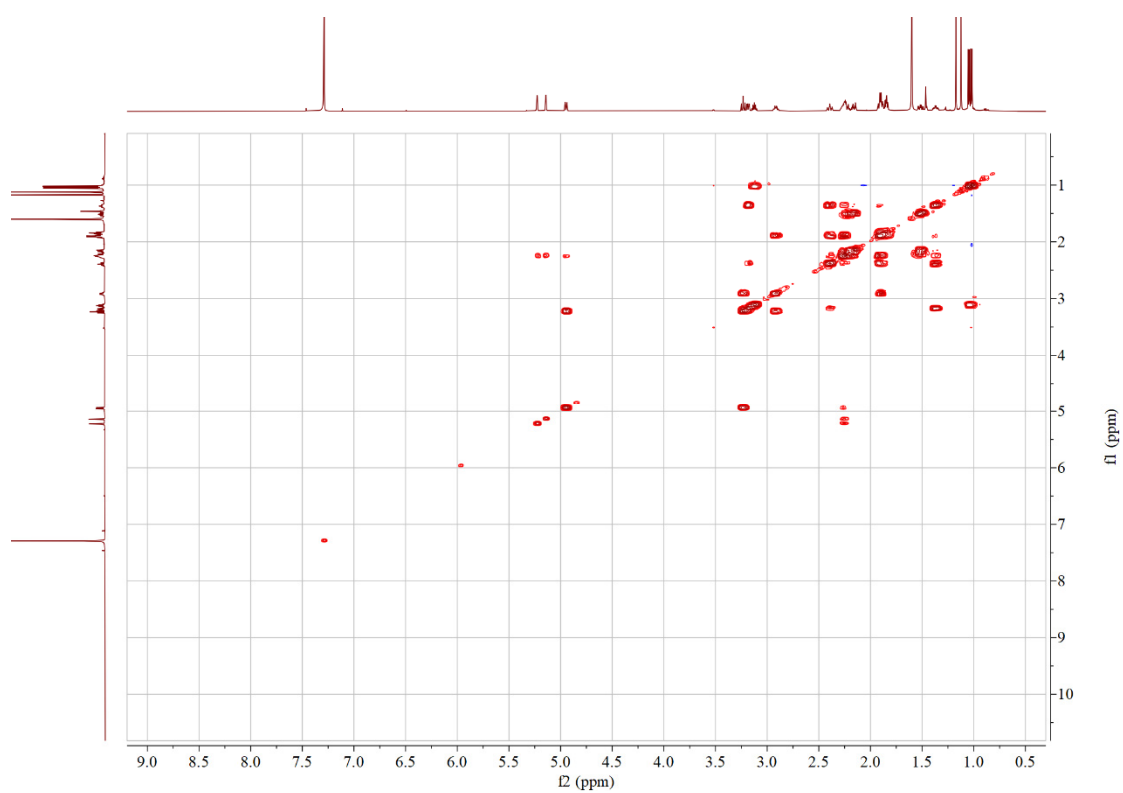

**Figure S4.**  $^1\text{H}$ - $^1\text{H}$  COSY spectrum of **1** (600 MHz,  $\text{CDCl}_3$ )

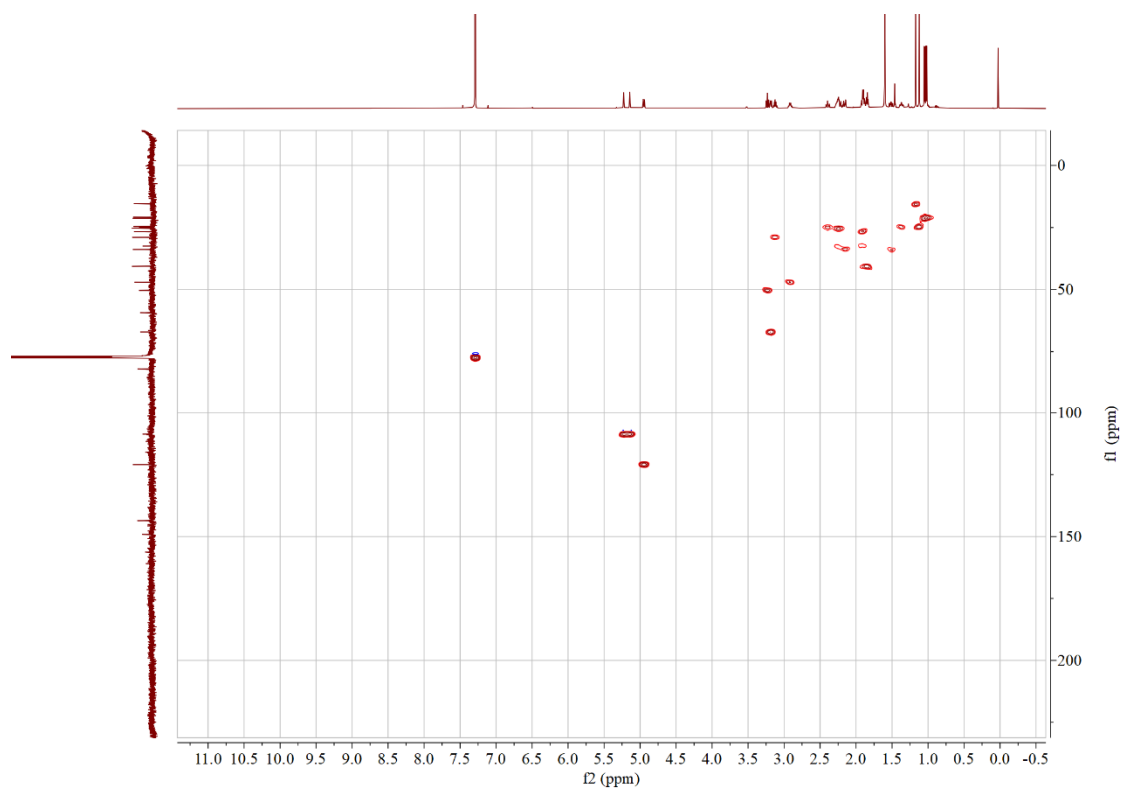

**Figure S5.** HSQC spectrum of **1** (600 MHz,  $\text{CDCl}_3$ )

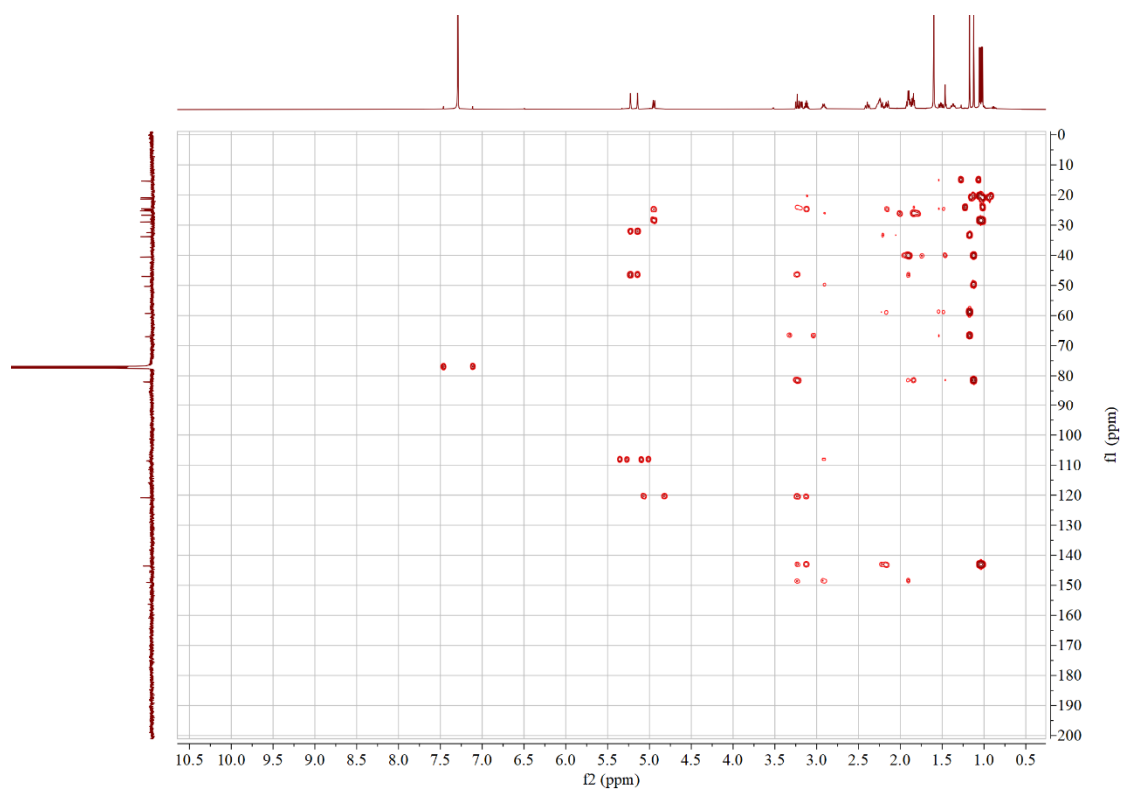

**Figure S6.** HMBC spectrum of **1** (600 MHz,  $\text{CDCl}_3$ )

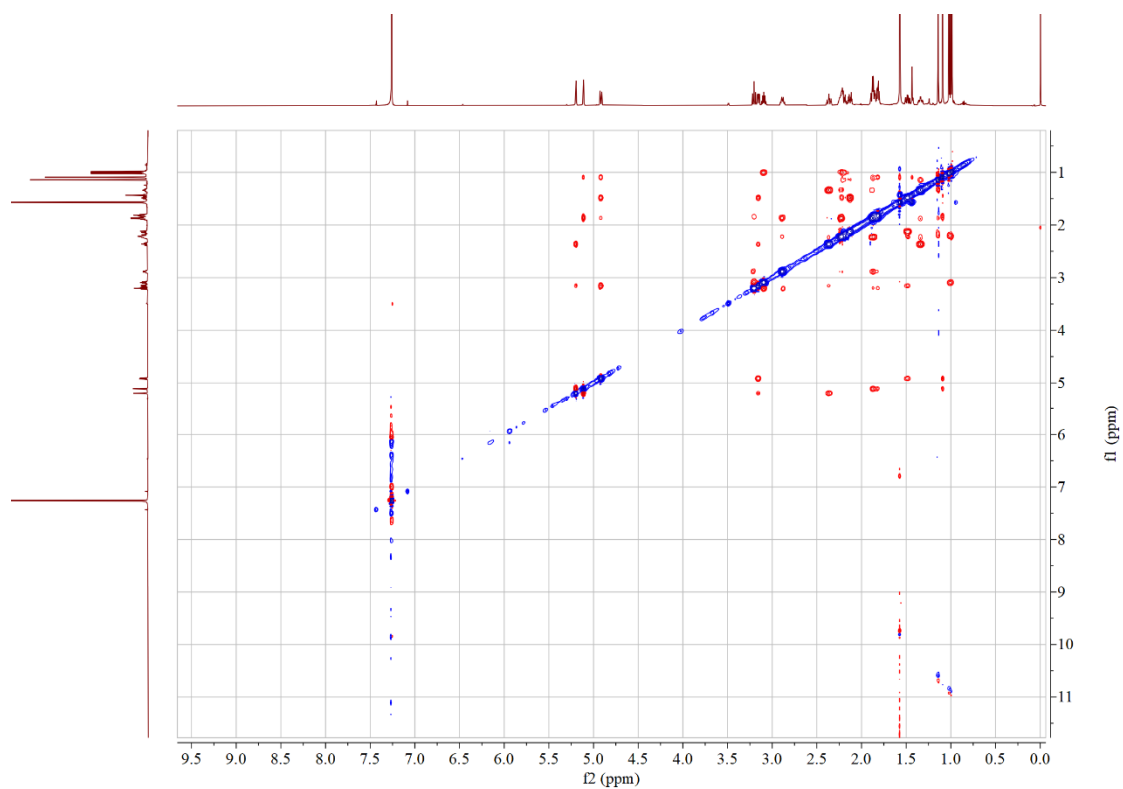

**Figure S7.** NOESY spectrum of **1** (600 MHz, CDCl<sub>3</sub>)

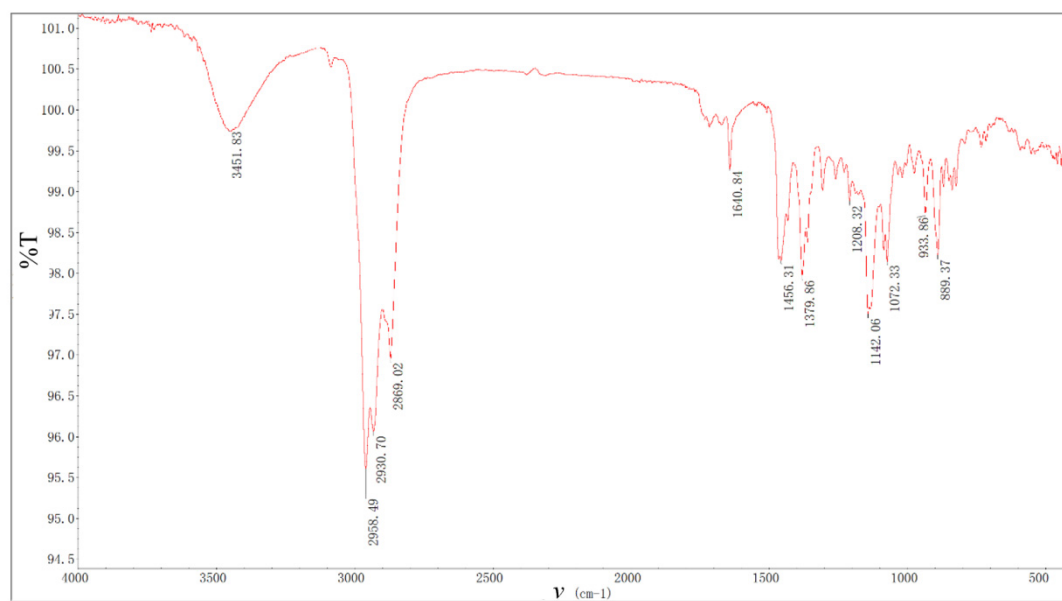

**Figure S8.** IR spectrum of **1**

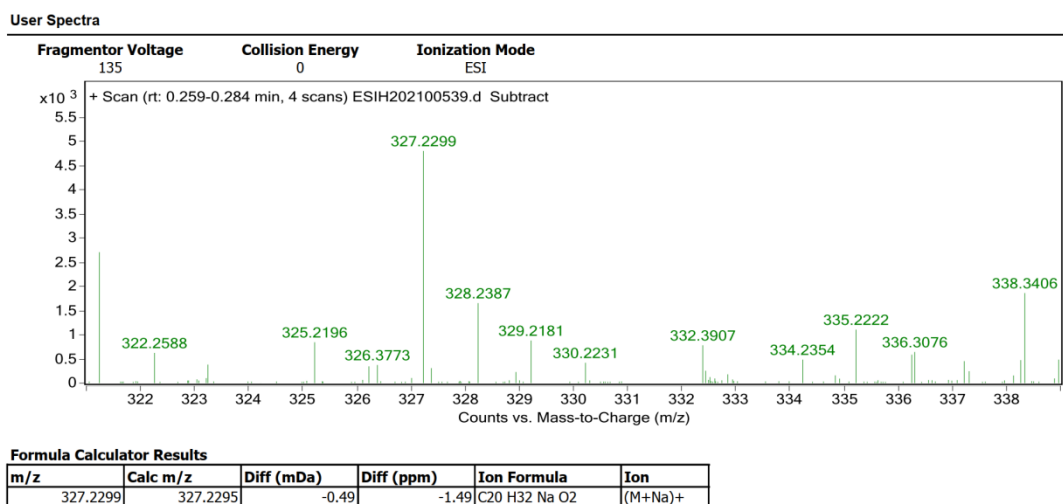

Figure S9. HRESIMS spectrum of **1**

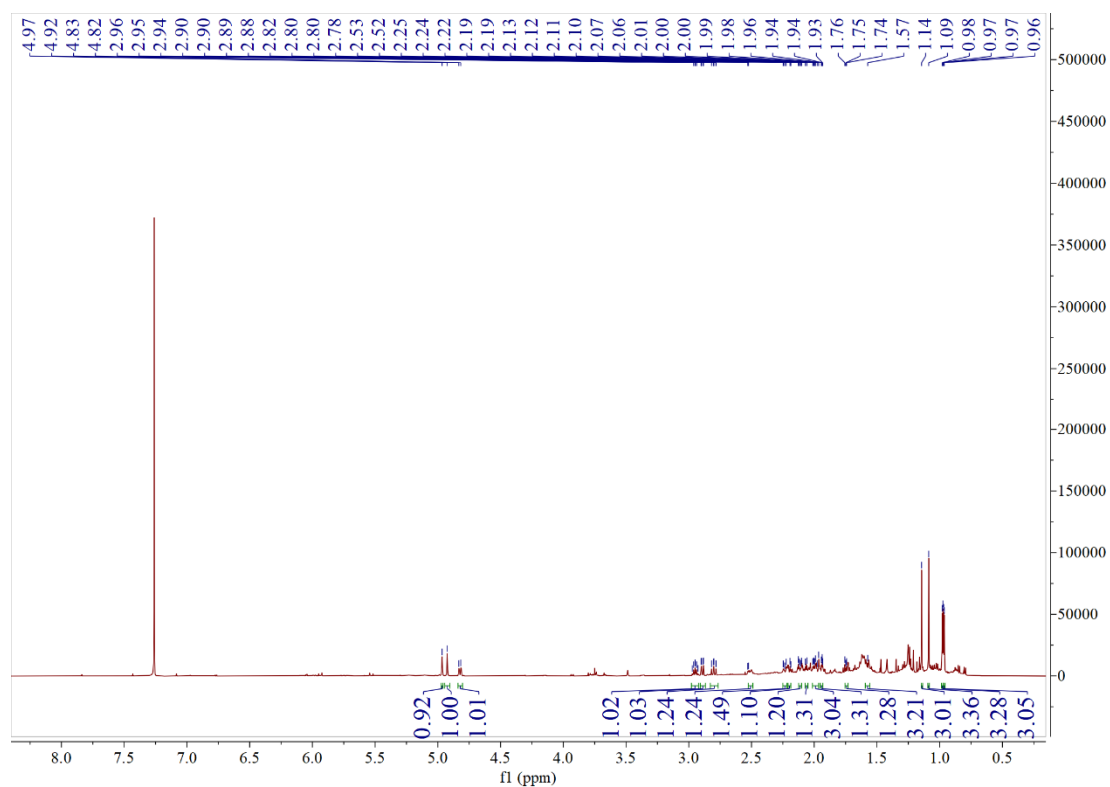

Figure S10. <sup>1</sup>H NMR spectrum of **2** (600MHz, CDCl<sub>3</sub>)



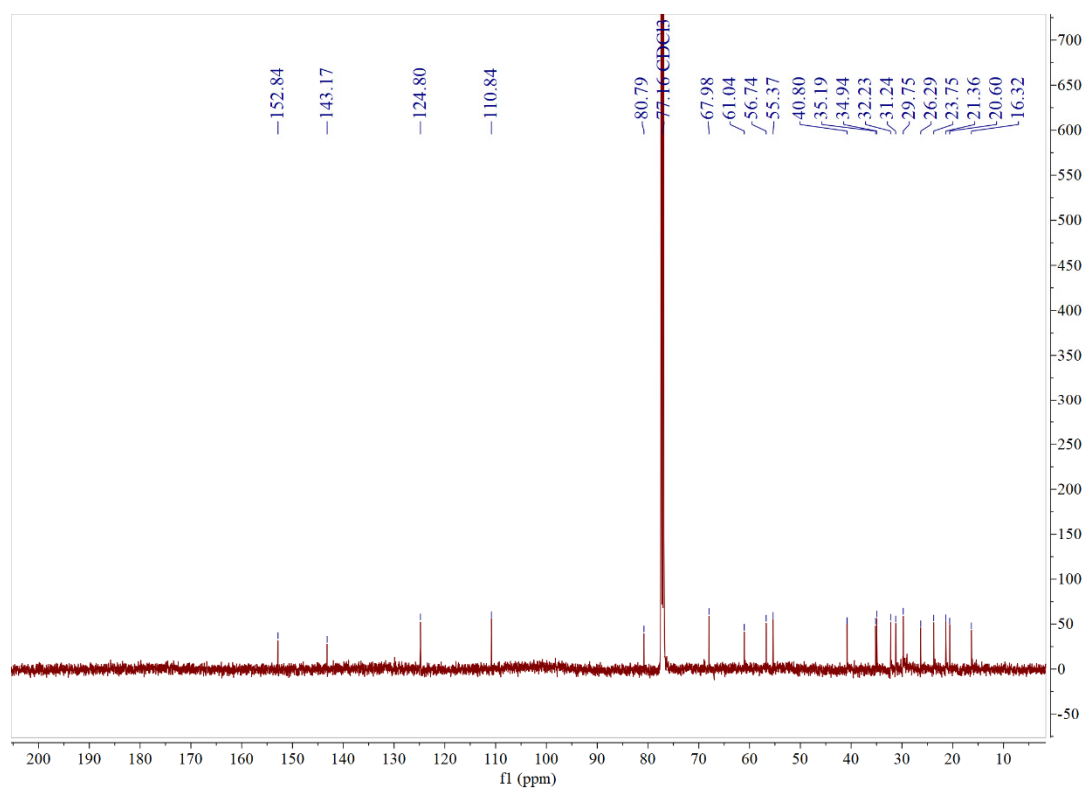

**Figure S11.** <sup>13</sup>C NMR spectrum of **2** (150 MHz, CDCl<sub>3</sub>)

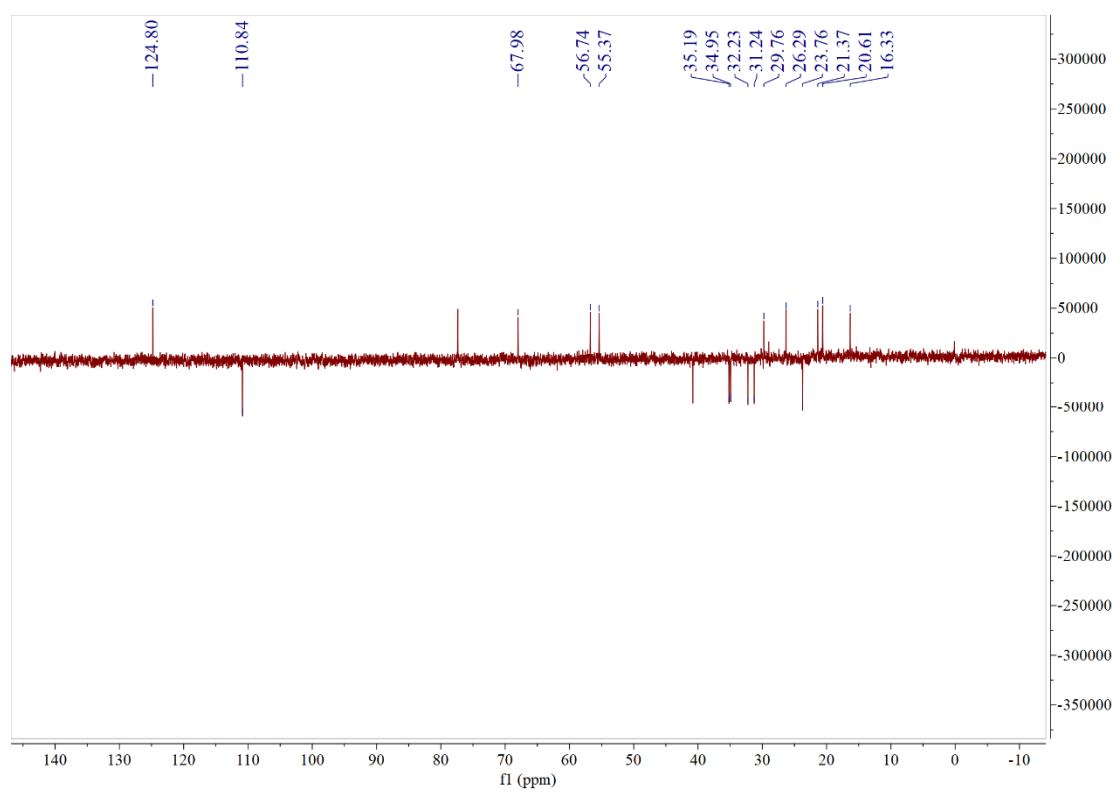

**Figure S12.** DEPT spectrum of **2** (150 MHz, CDCl<sub>3</sub>)

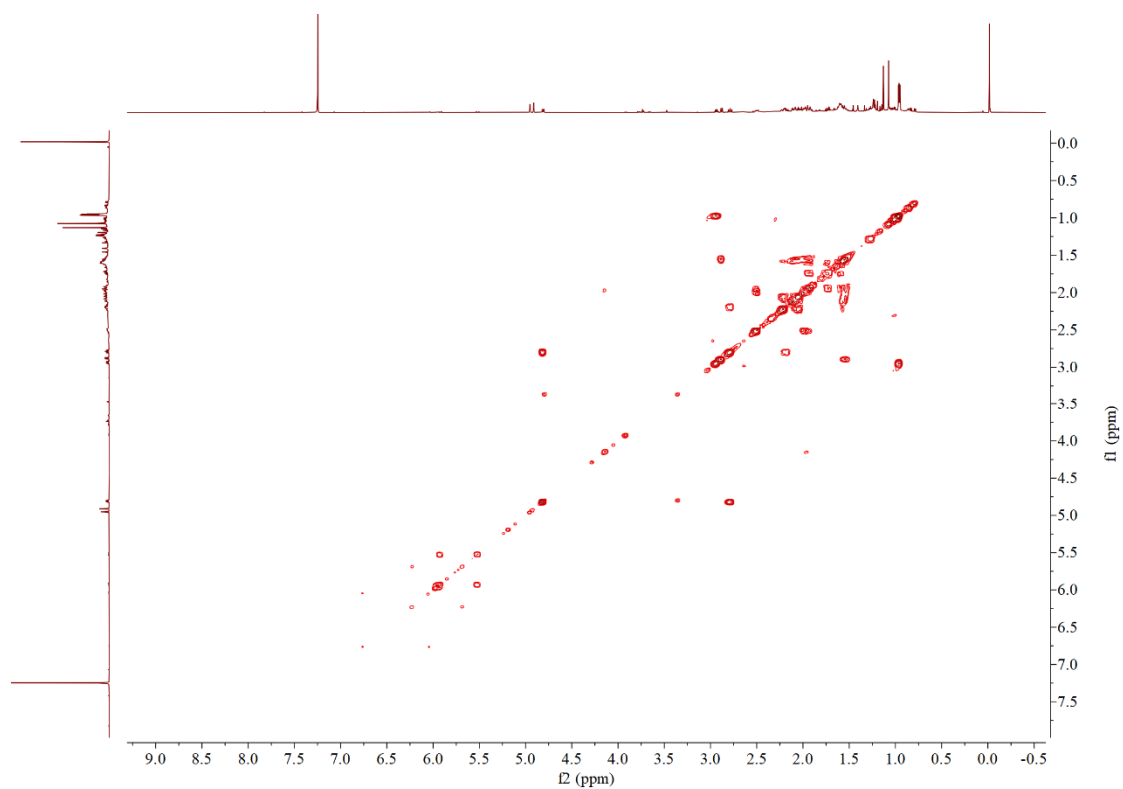

**Figure S13.**  $^1\text{H}$ - $^1\text{H}$  COSY spectrum of **2** (600 MHz,  $\text{CDCl}_3$ )

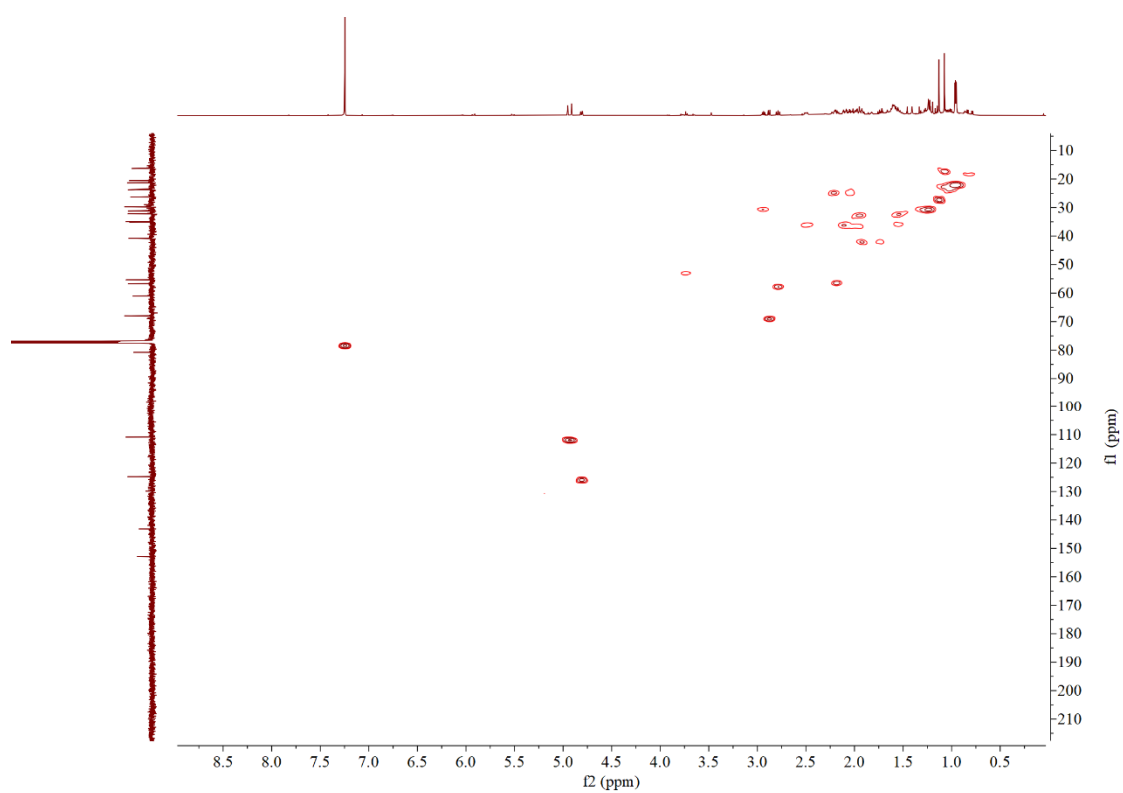

**Figure S14.** HSQC spectrum of **2** (600 MHz,  $\text{CDCl}_3$ )

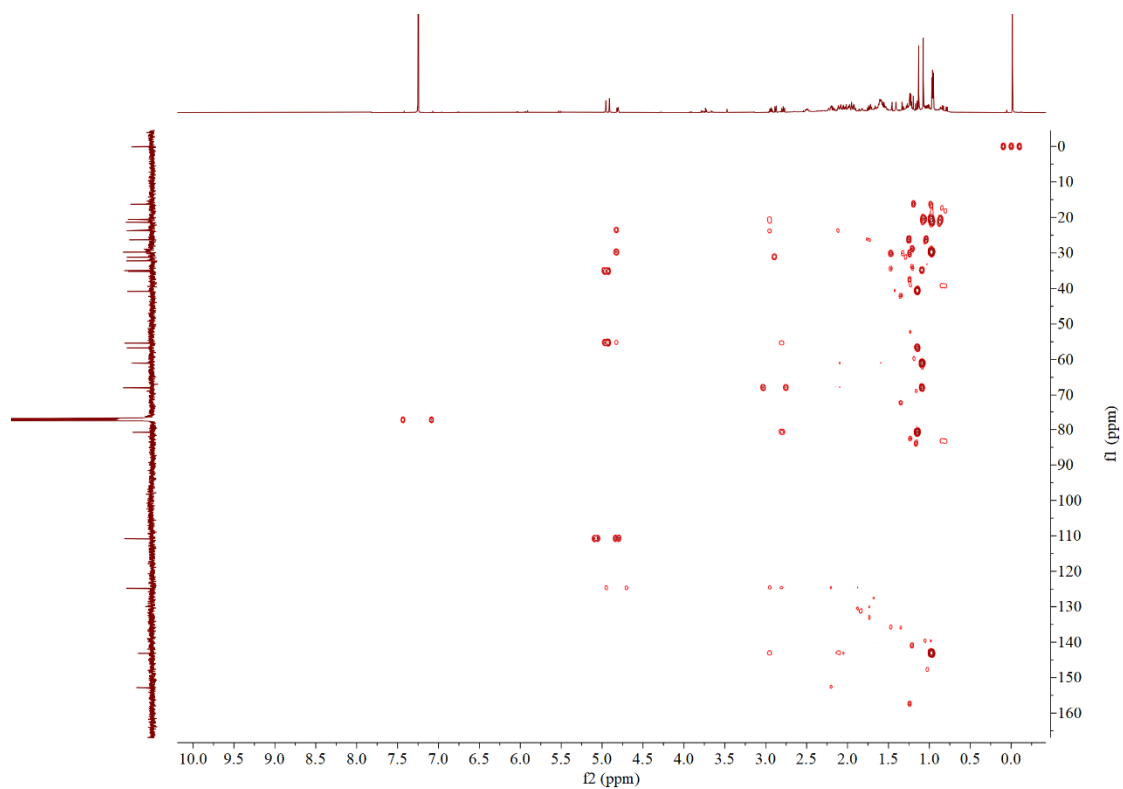

**Figure S15.** HMBC spectrum of **2** (600 MHz, CDCl<sub>3</sub>)

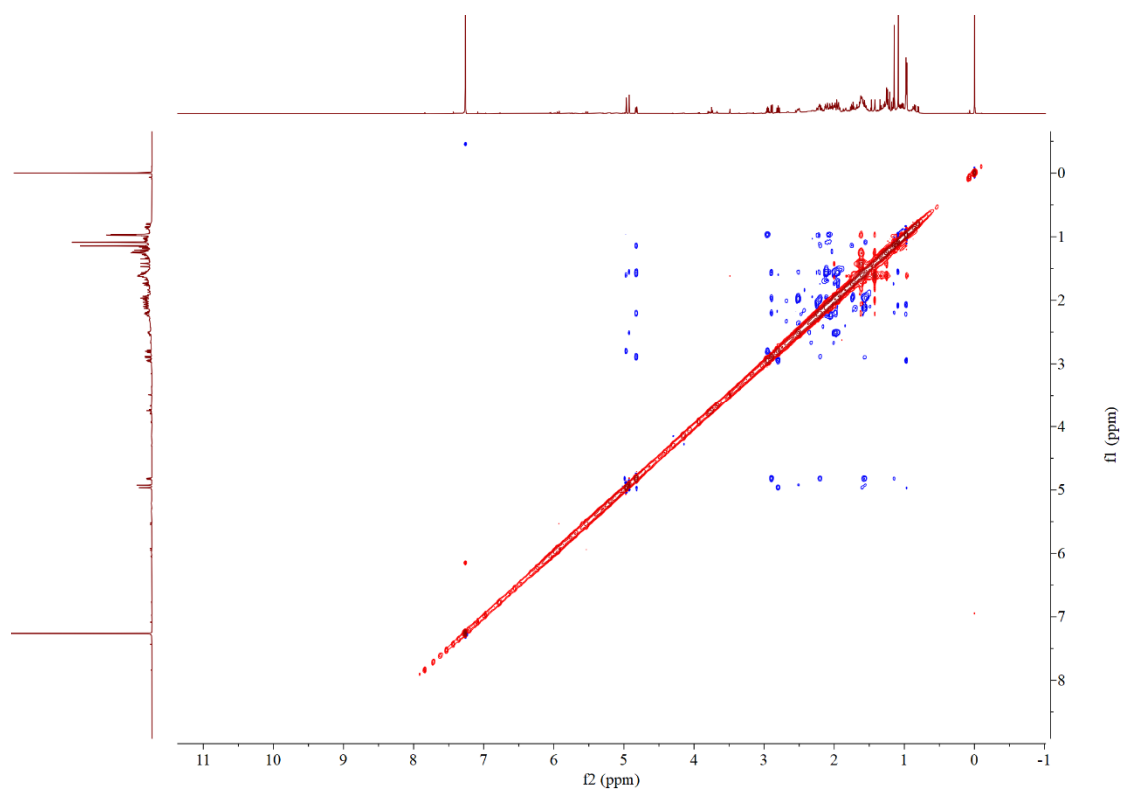

**Figure S16.** NOESY spectrum of **2** (600 MHz, CDCl<sub>3</sub>)

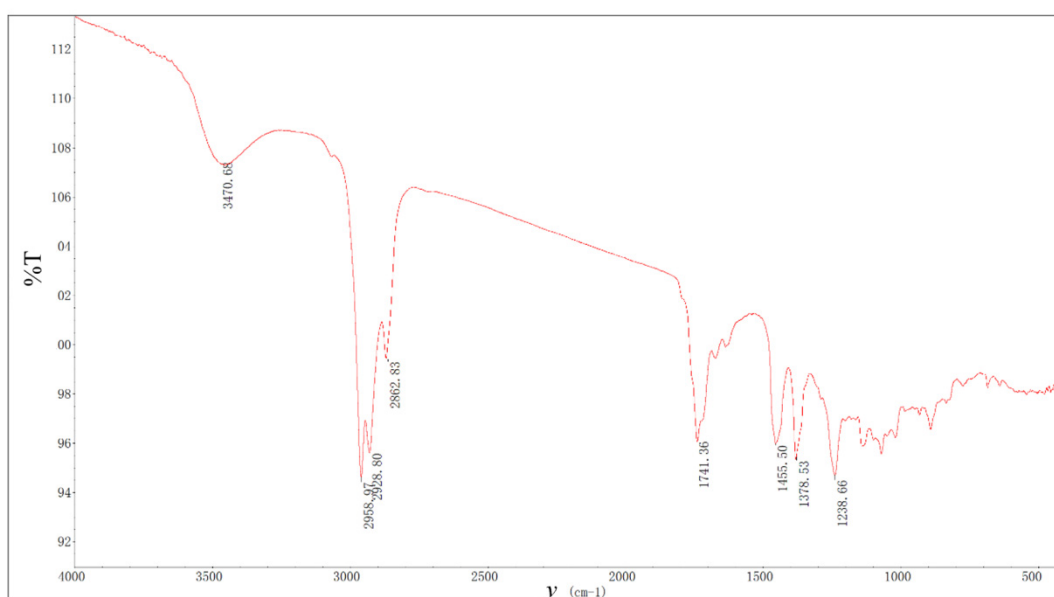

**Figure S17.** IR spectrum of **2**

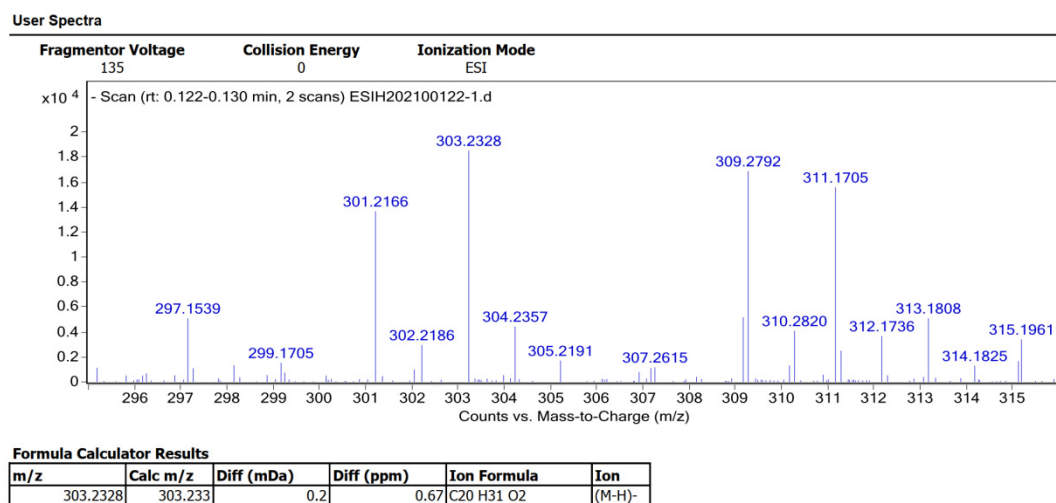

**Figure S18.** HRESIMS spectrum of **2**

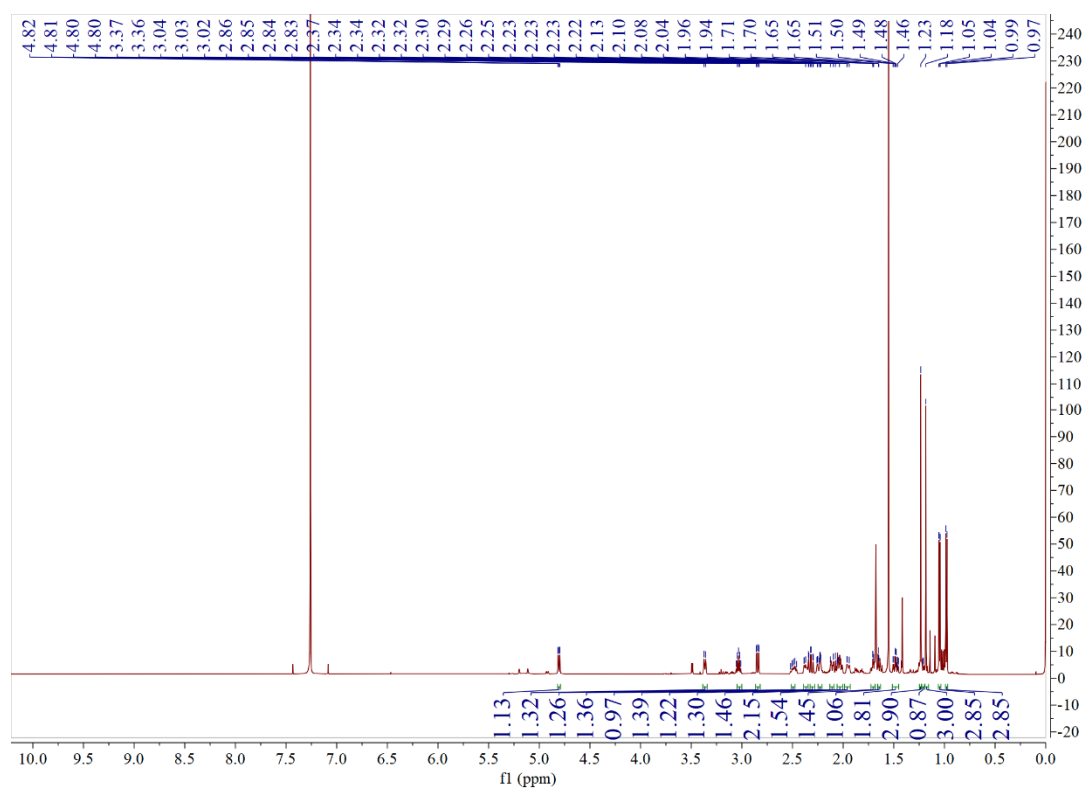

**Figure S19.**  $^1\text{H}$  NMR spectrum of **3** (600MHz,  $\text{CDCl}_3$ )

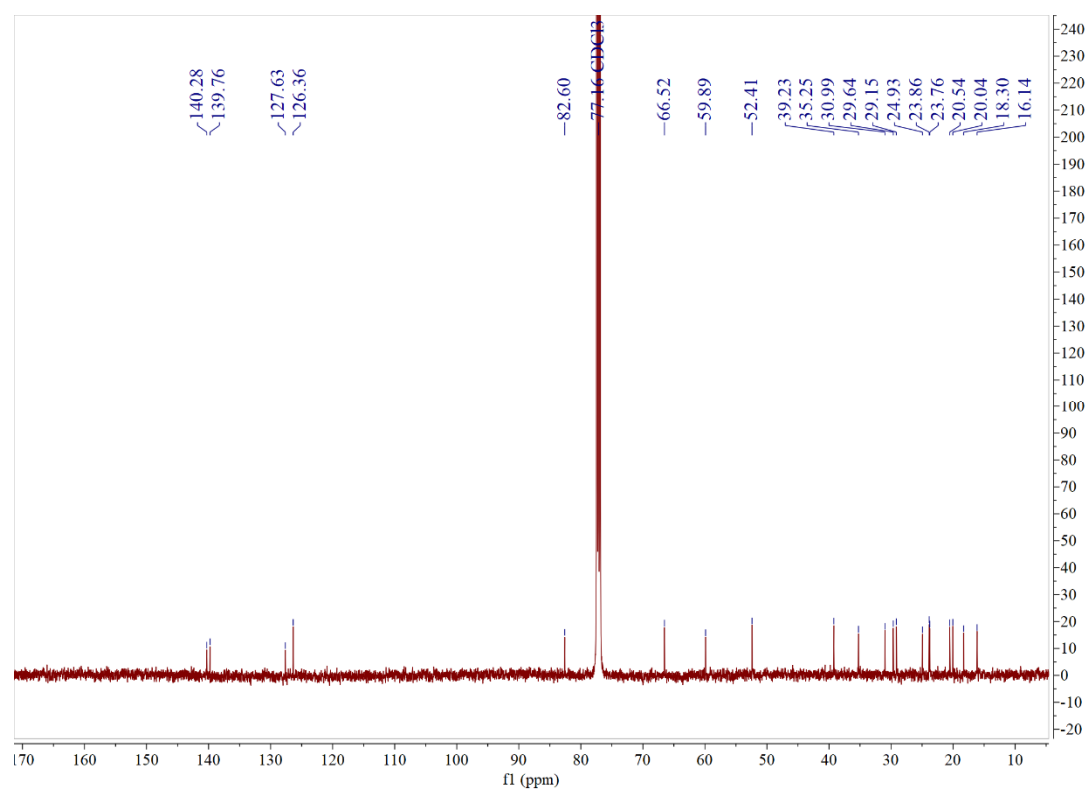

**Figure S20.**  $^{13}\text{C}$  NMR spectrum of **3** (150 MHz,  $\text{CDCl}_3$ )

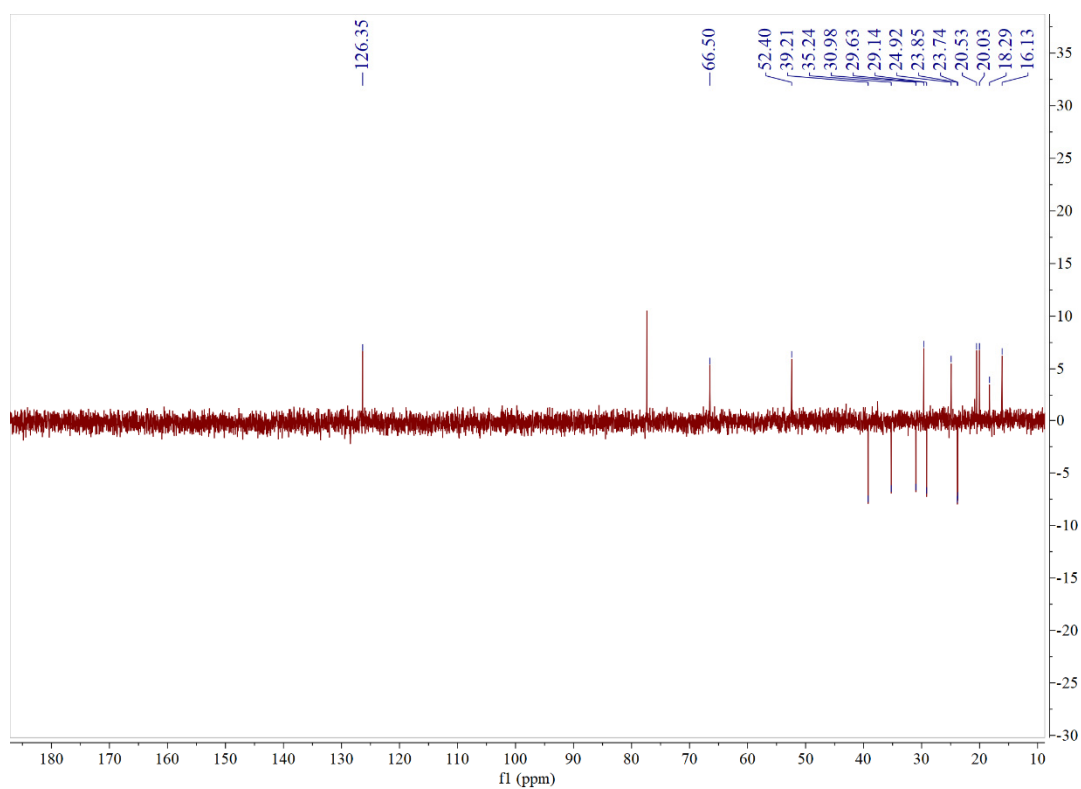

**Figure S21.** DEPT spectrum of **3** (150 MHz, CDCl<sub>3</sub>)

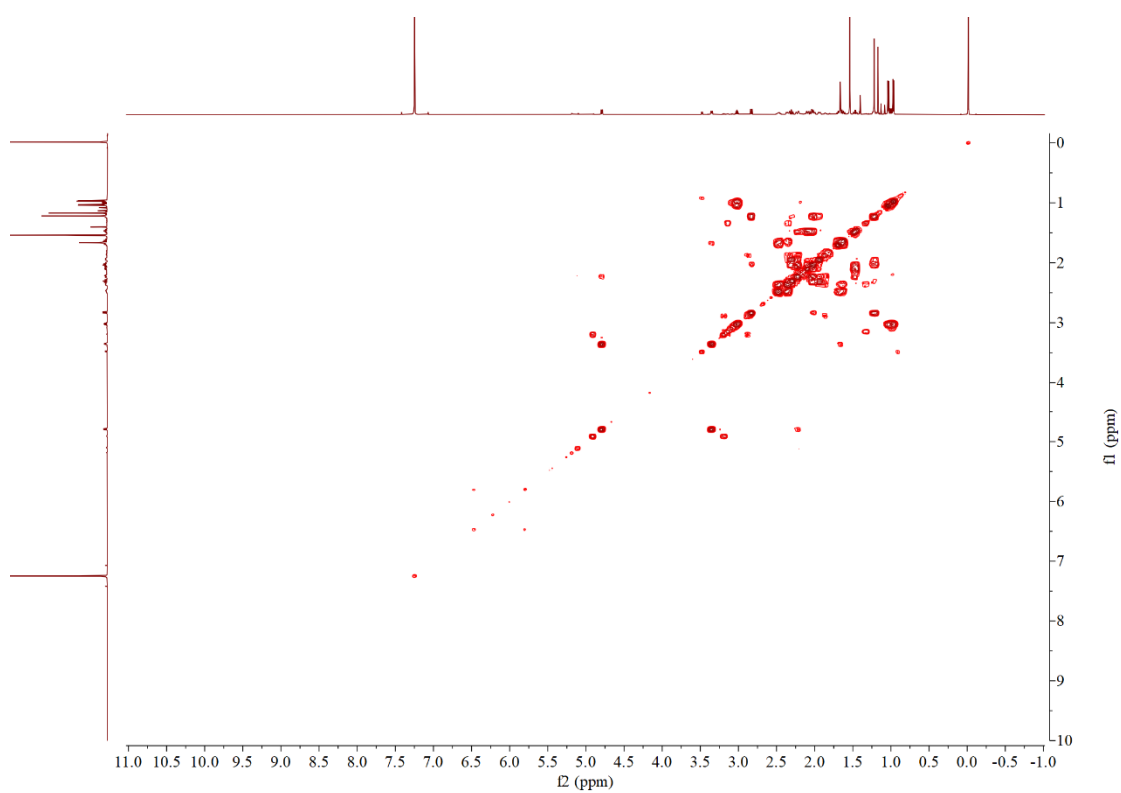

**Figure S22.** <sup>1</sup>H–<sup>1</sup>H COSY spectrum of **3** (600 MHz, CDCl<sub>3</sub>)

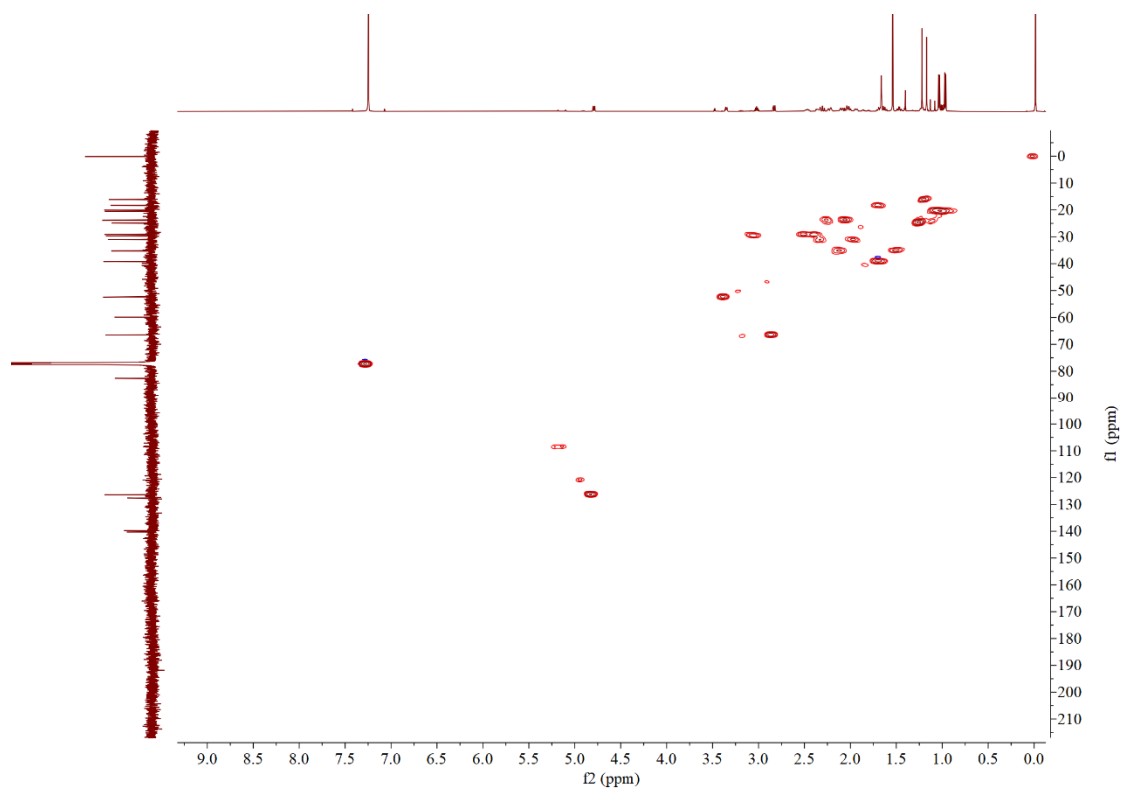

**Figure S23.** HSQC spectrum of **3** (600MHz, CDCl<sub>3</sub>)

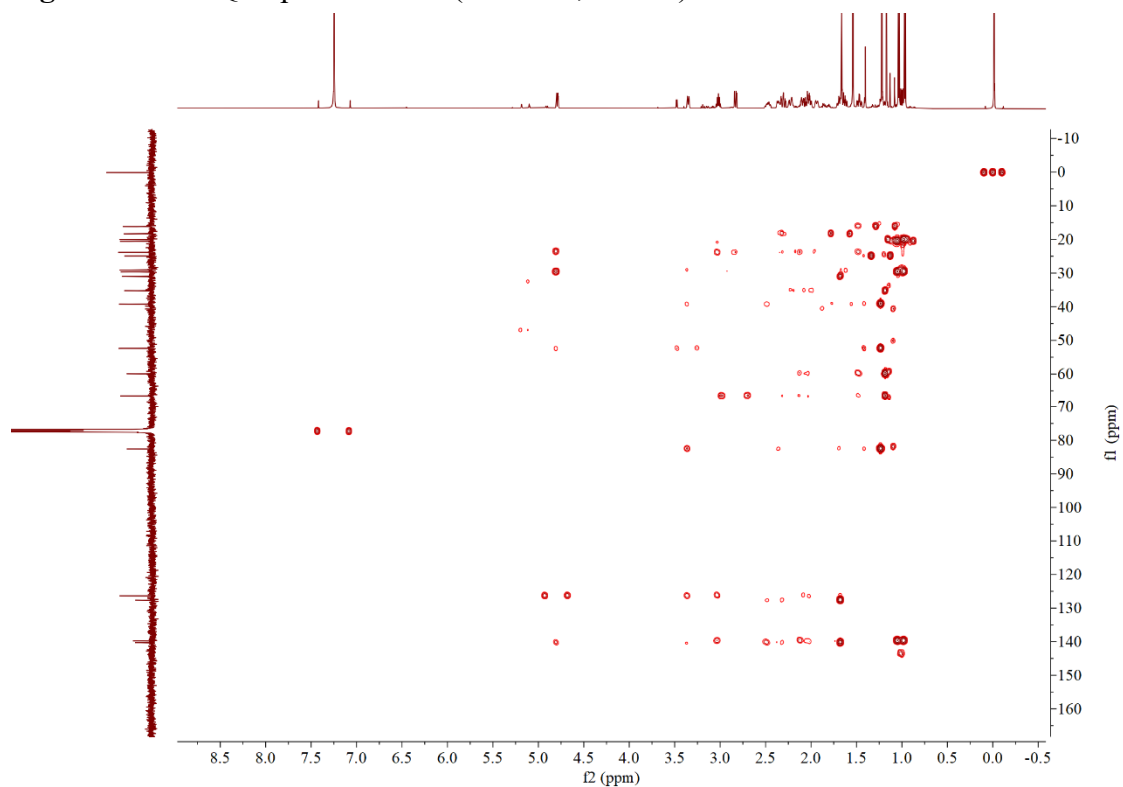

**Figure S24.** HMBC spectrum of **3** (600 MHz, CDCl<sub>3</sub>)

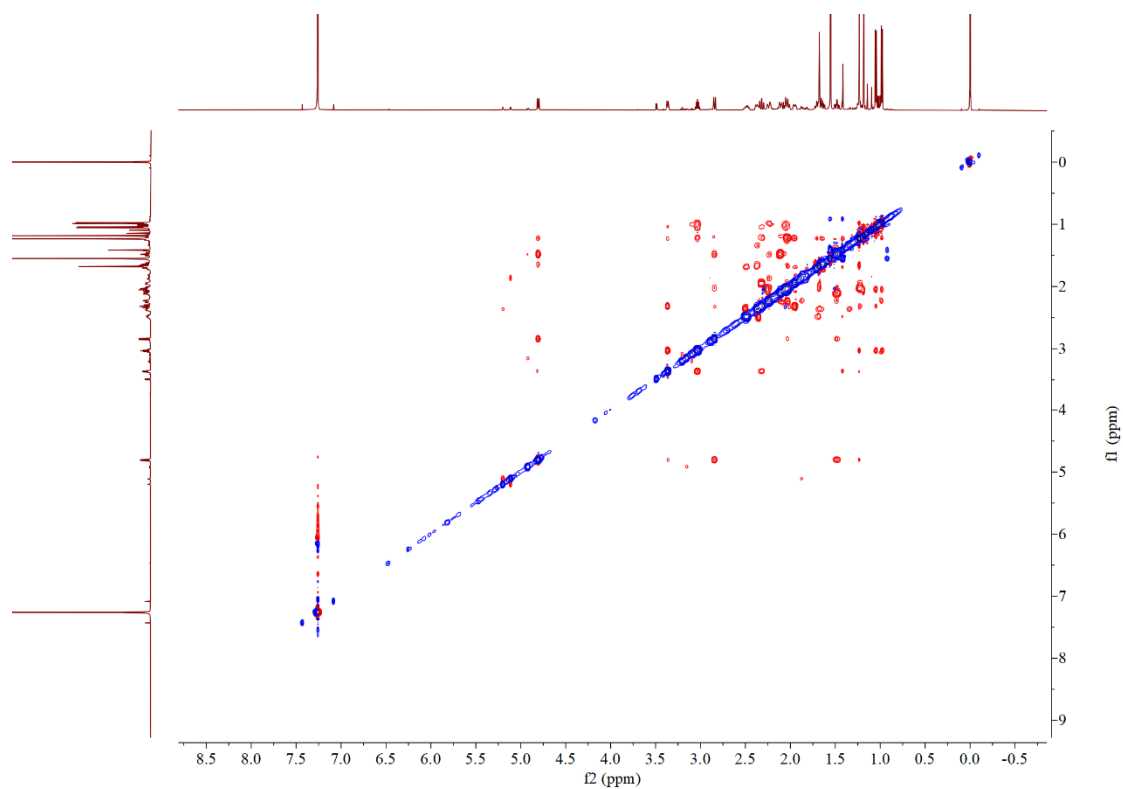

**Figure S25.** NOESY spectrum of **3** (600MHz, CDCl<sub>3</sub>)

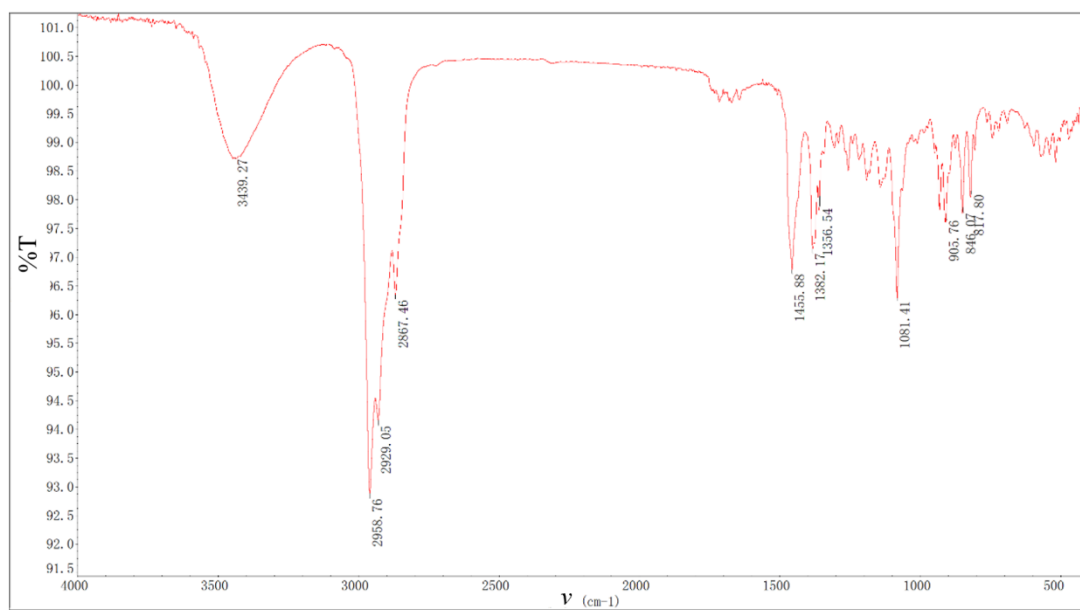

**Figure S26.** IR spectrum of **3**



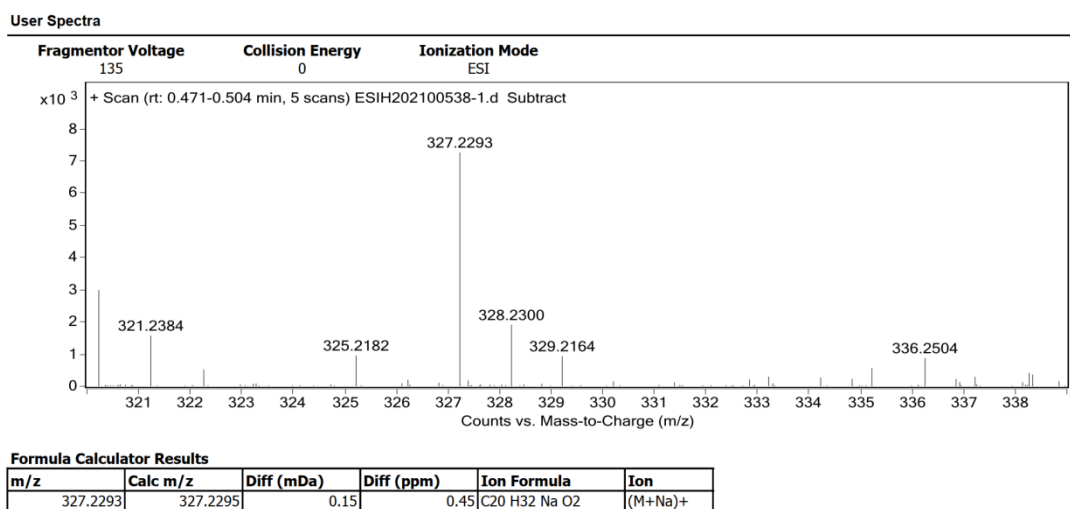

Figure S27. HRESIMR spectrum of **3**

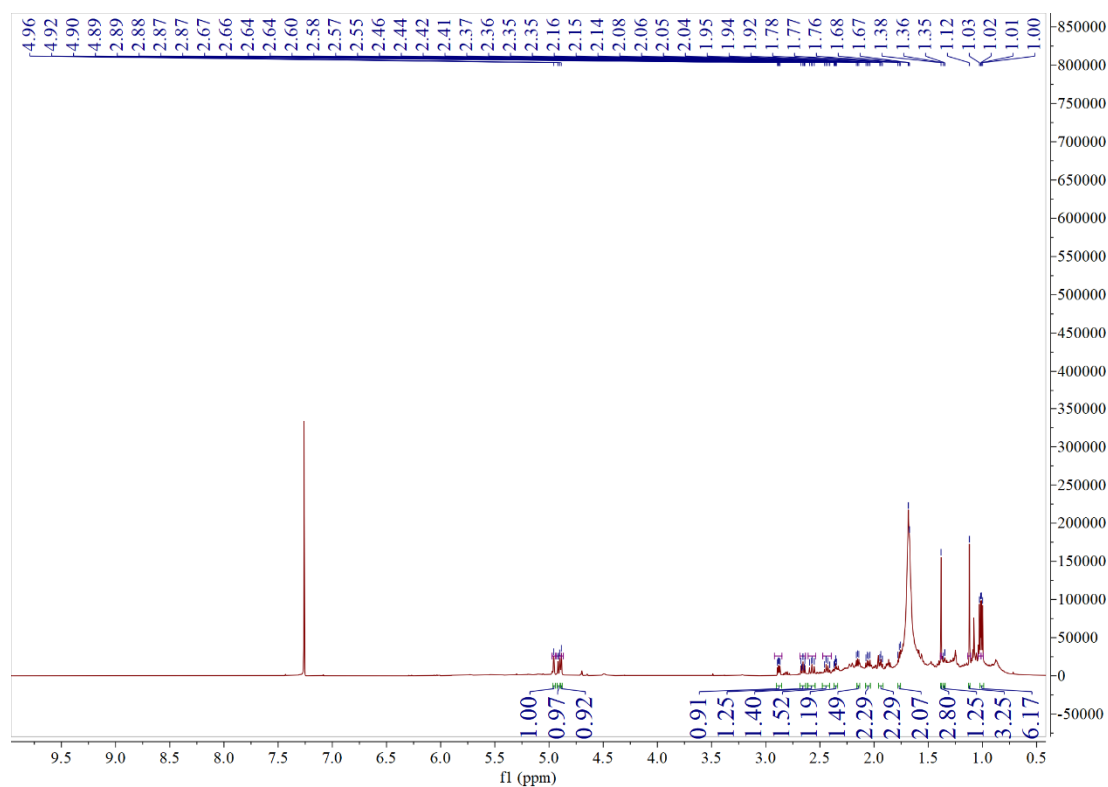

Figure S28. <sup>1</sup>H NMR spectrum of **4** (600MHz, CDCl<sub>3</sub>)

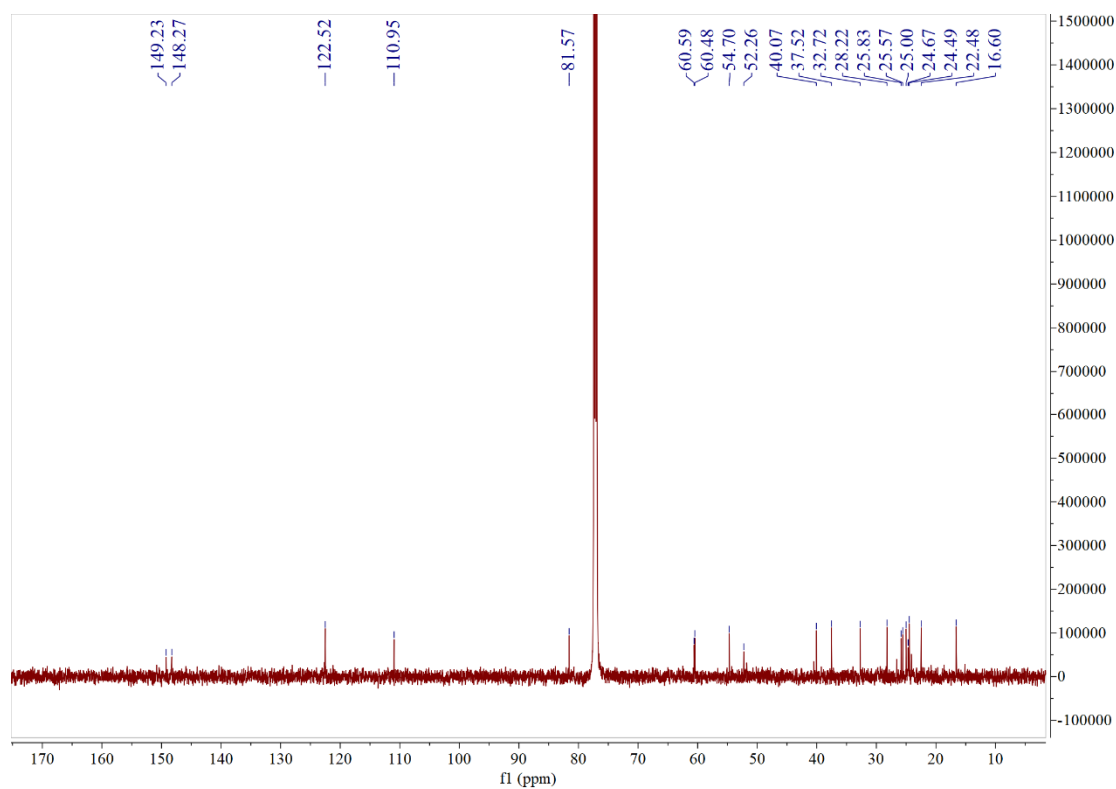

**Figure S29.** <sup>13</sup>C NMR spectrum of **4** (150 MHz, CDCl<sub>3</sub>)

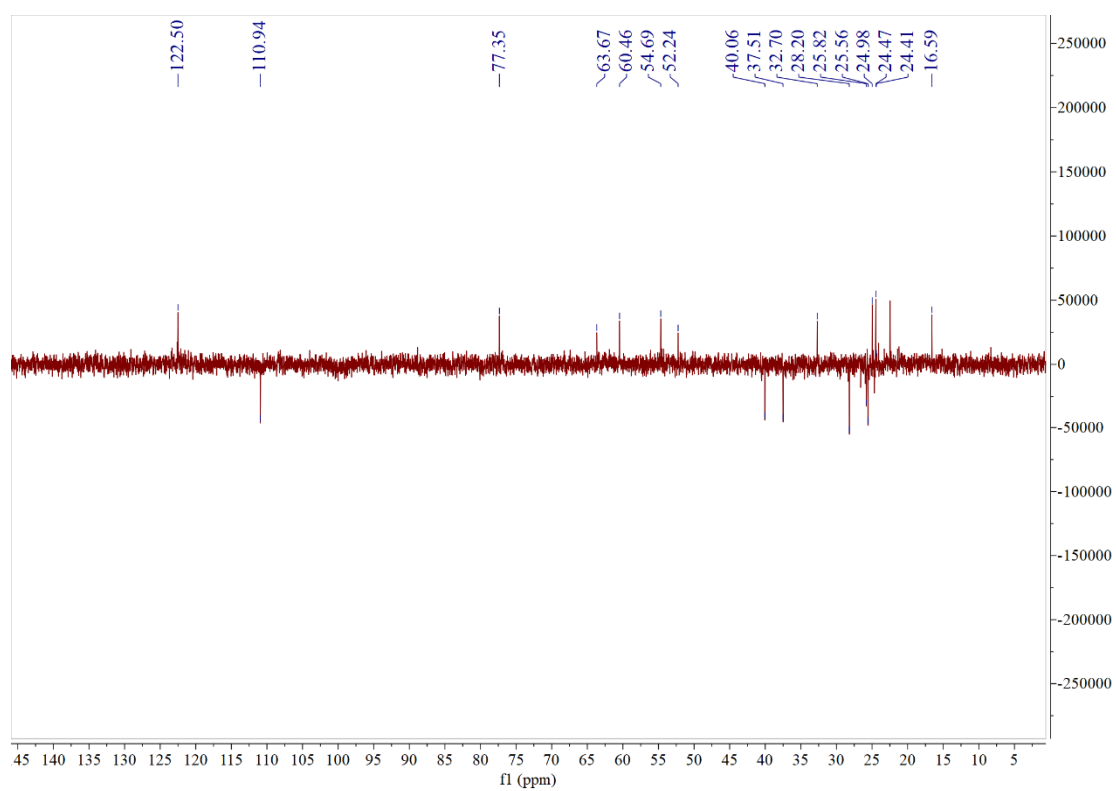

**Figure S30.** DEPT spectrum of **4** (150 MHz, CDCl<sub>3</sub>)

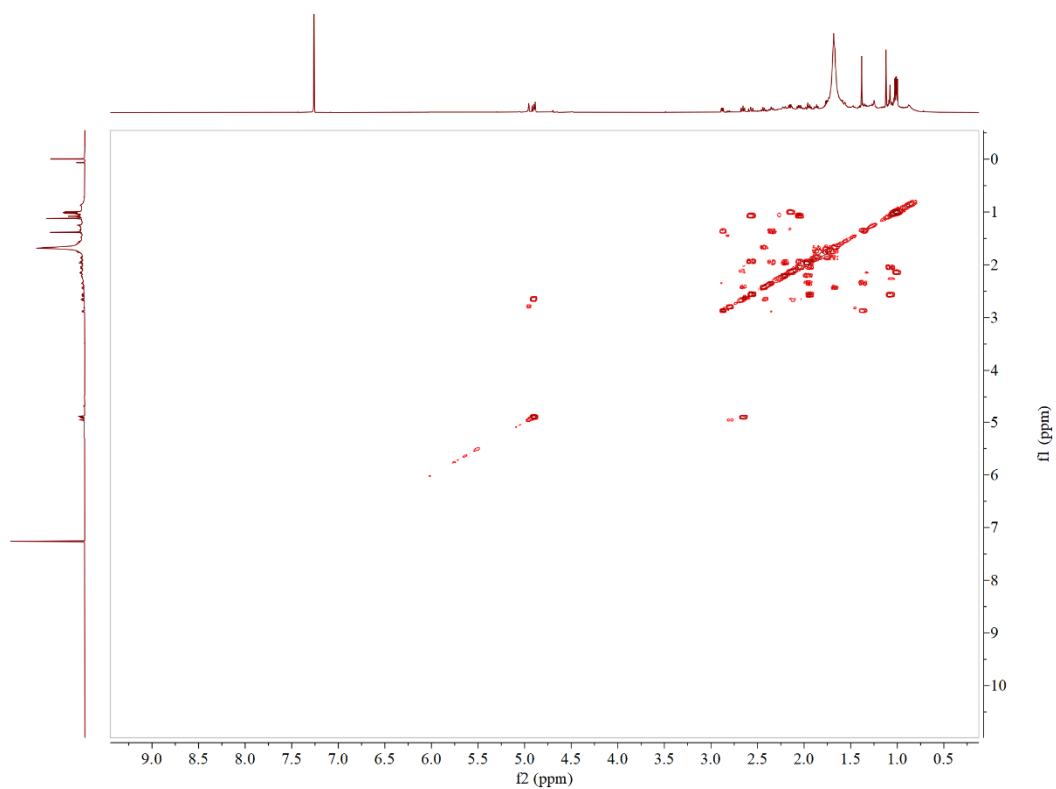

**Figure S31.**  $^1\text{H}$ - $^1\text{H}$  COSY spectrum of **4** (600 MHz,  $\text{CDCl}_3$ )

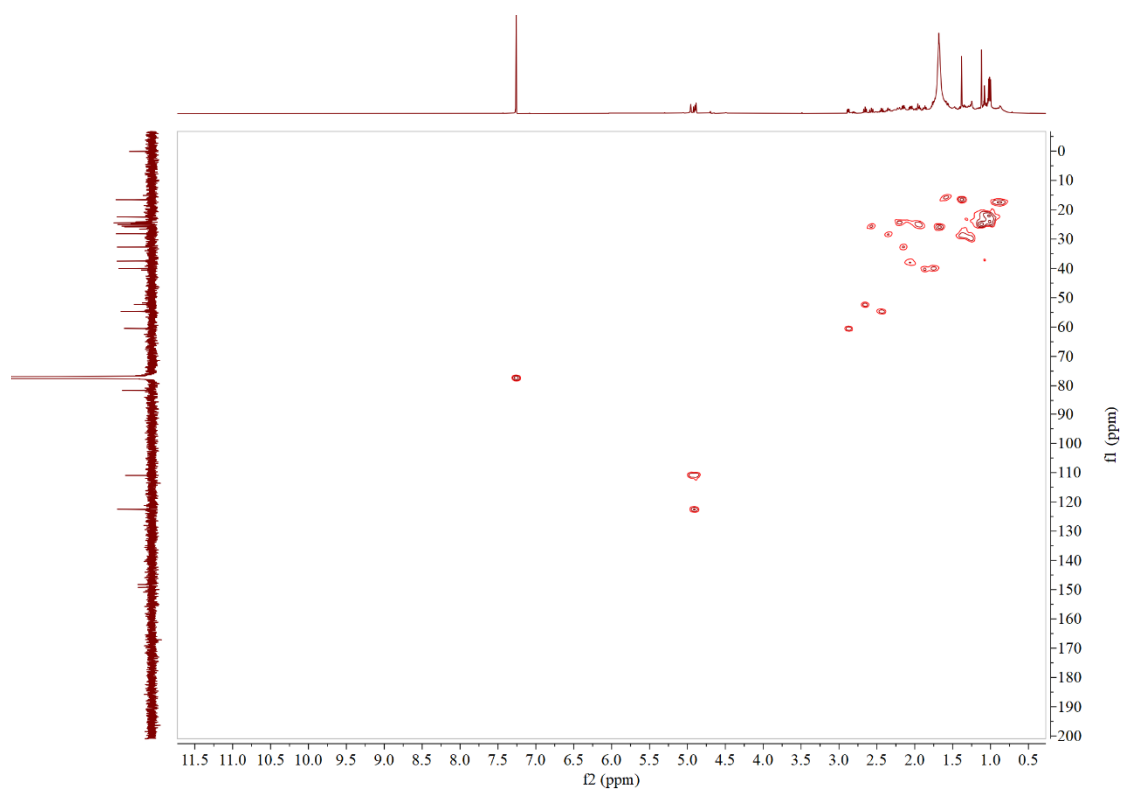

**Figure S32.** HSQC spectrum of **4** (600 MHz,  $\text{CDCl}_3$ )

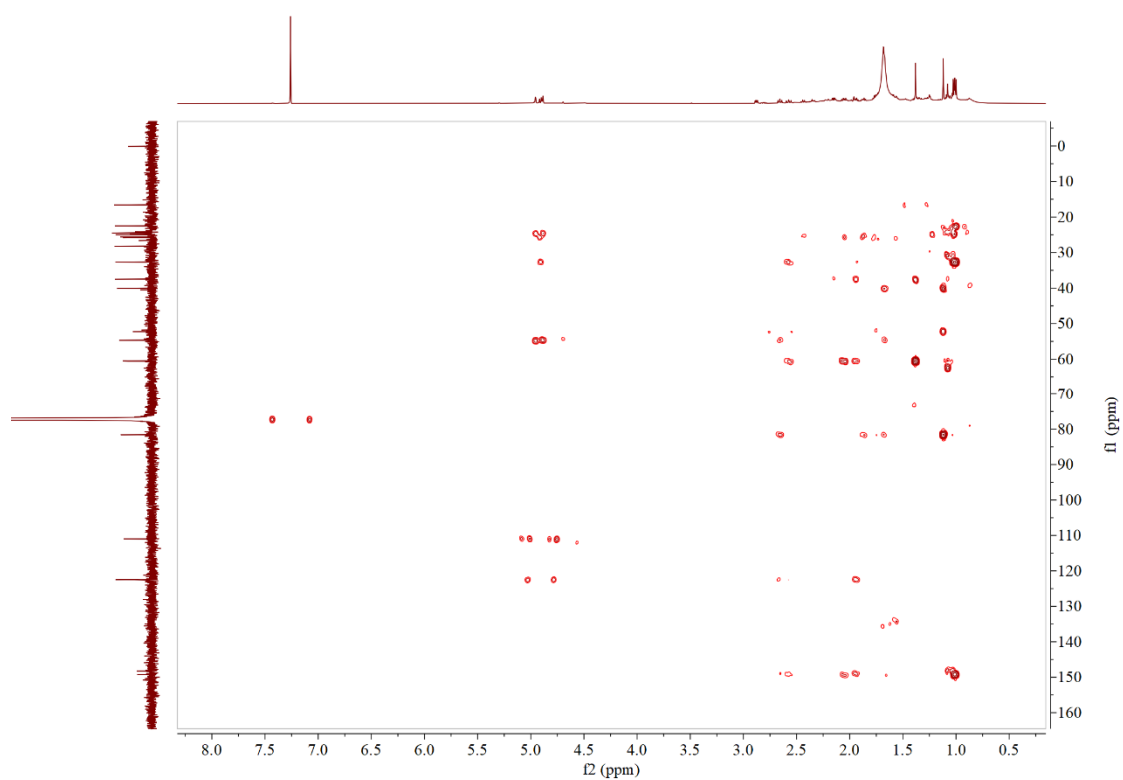

**Figure S33.** HMBC spectrum of **4** (600 MHz, CDCl<sub>3</sub>)

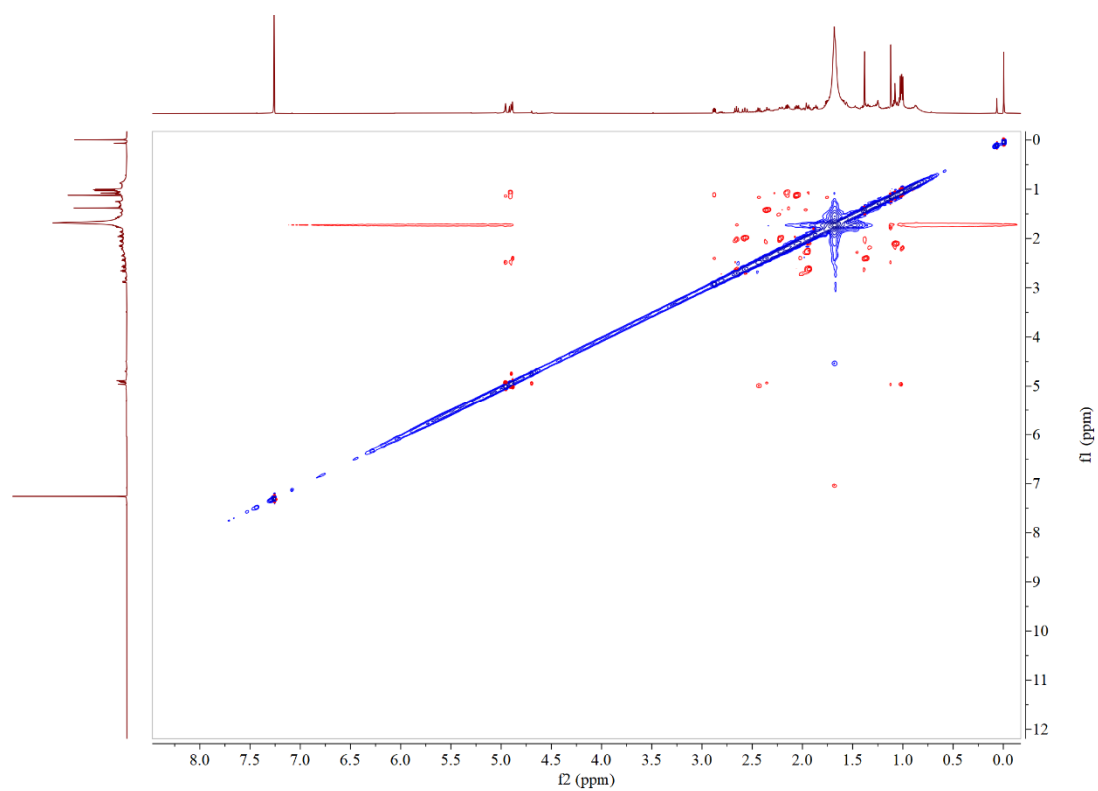

**Figure S34.** NOESY spectrum of **4** (600 MHz, CDCl<sub>3</sub>)

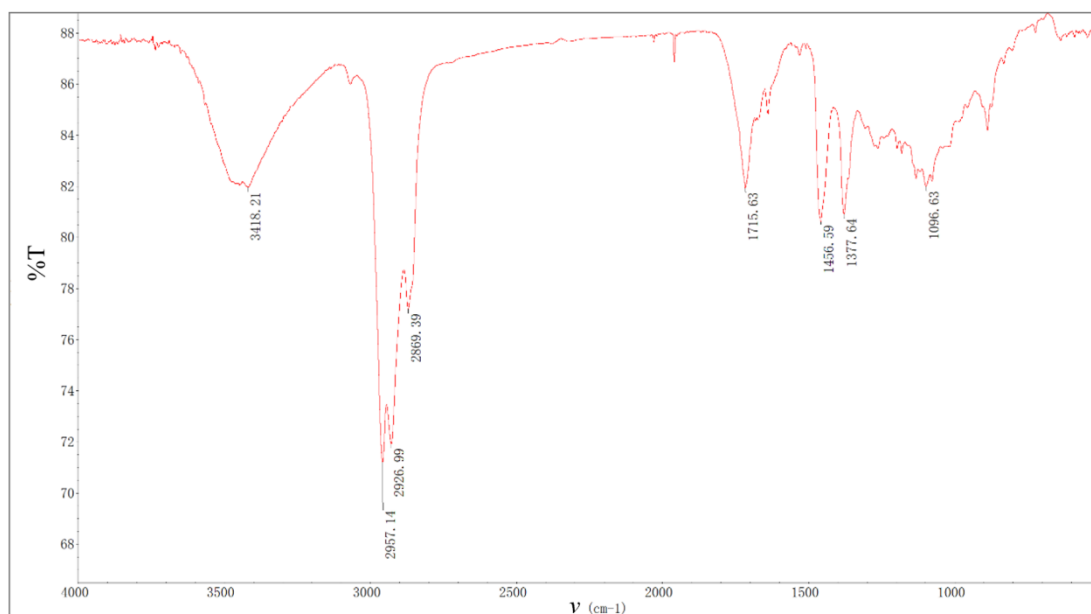

**Figure S35.** IR spectrum of **4**

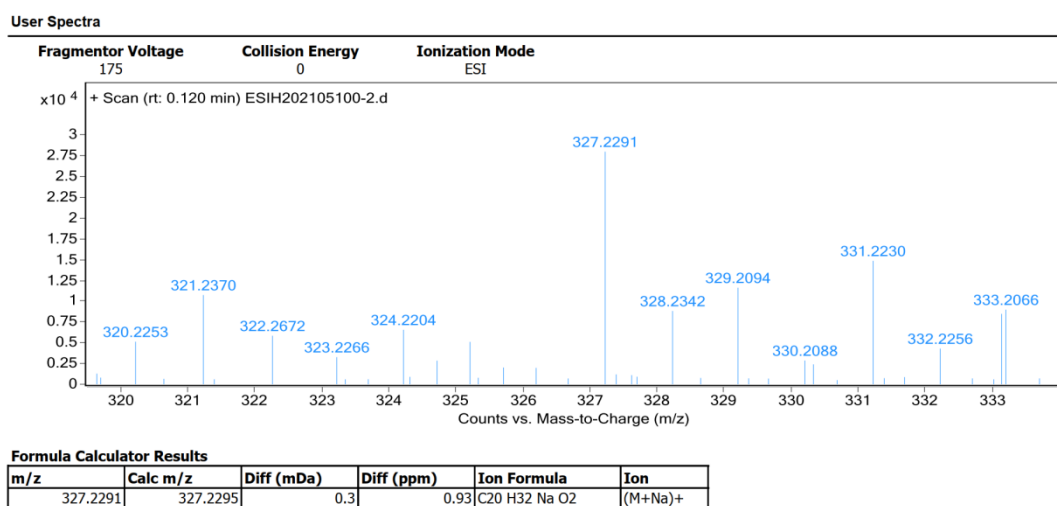

**Figure S36.** HRESIMR spectrum of **4**

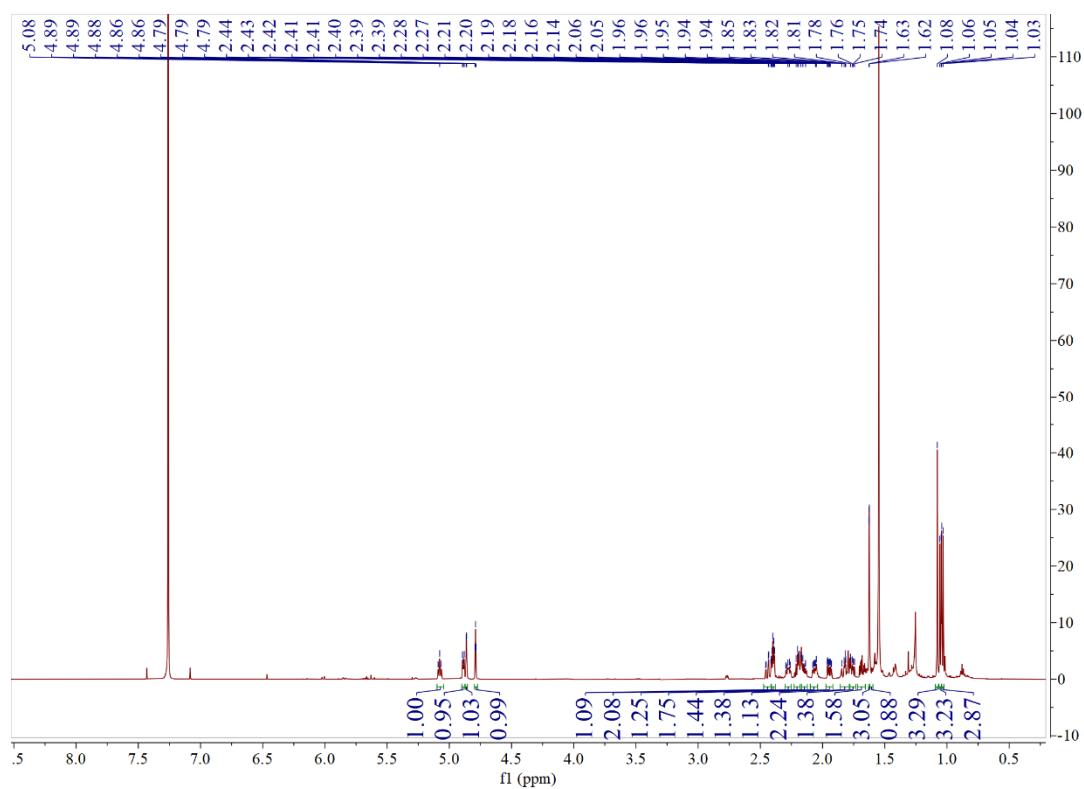

**Figure S37.**  $^1\text{H}$  NMR spectrum of **5** (600MHz,  $\text{CDCl}_3$ )

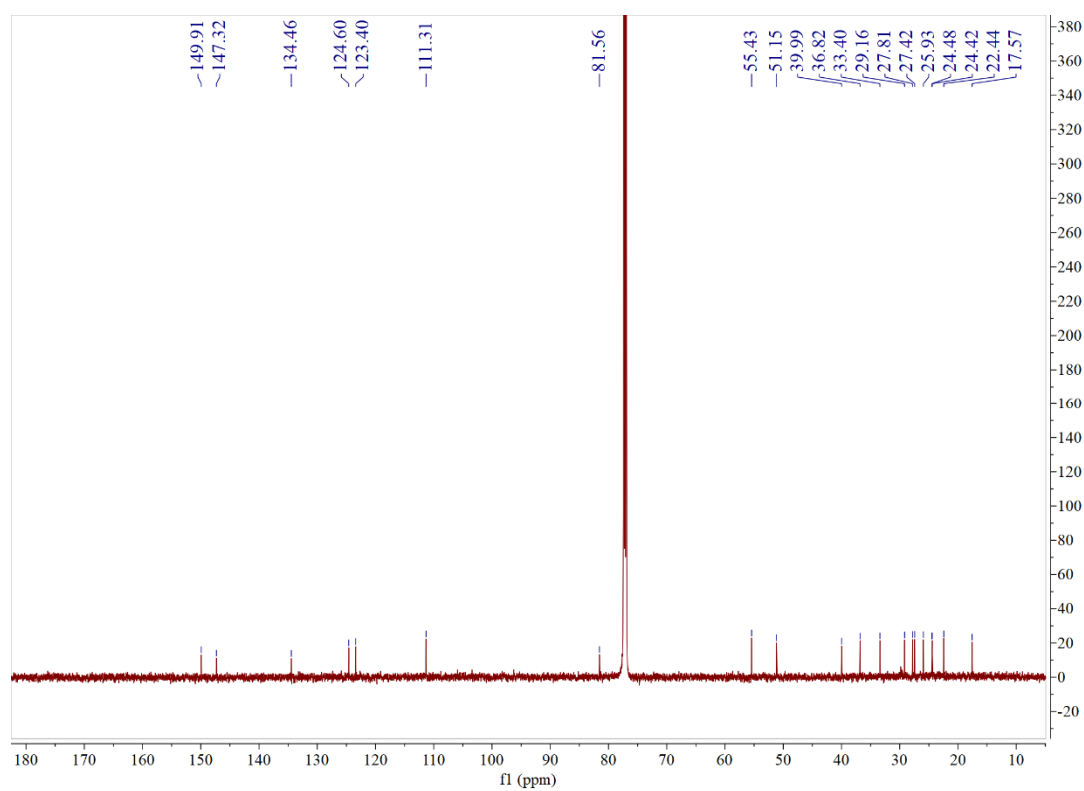

**Figure S38.**  $^{13}\text{C}$  NMR spectrum of **5** (150 MHz,  $\text{CDCl}_3$ )

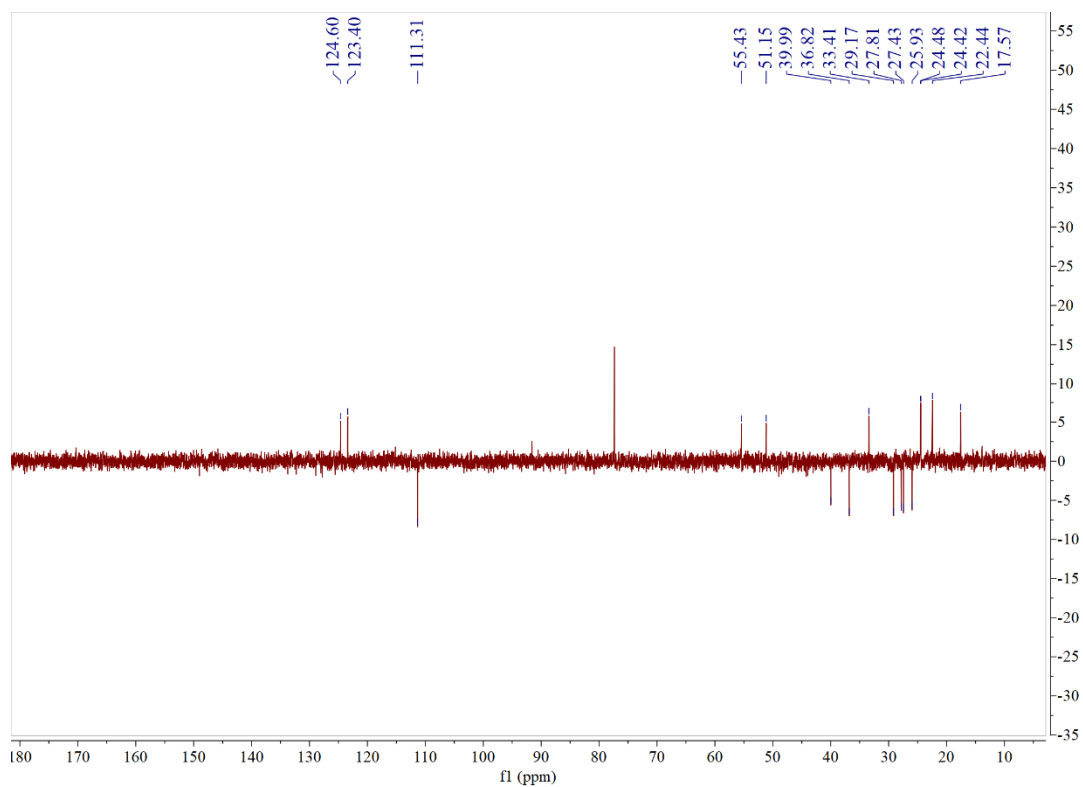

**Figure S39.** DEPT spectrum of **5** (150 MHz, CDCl<sub>3</sub>)

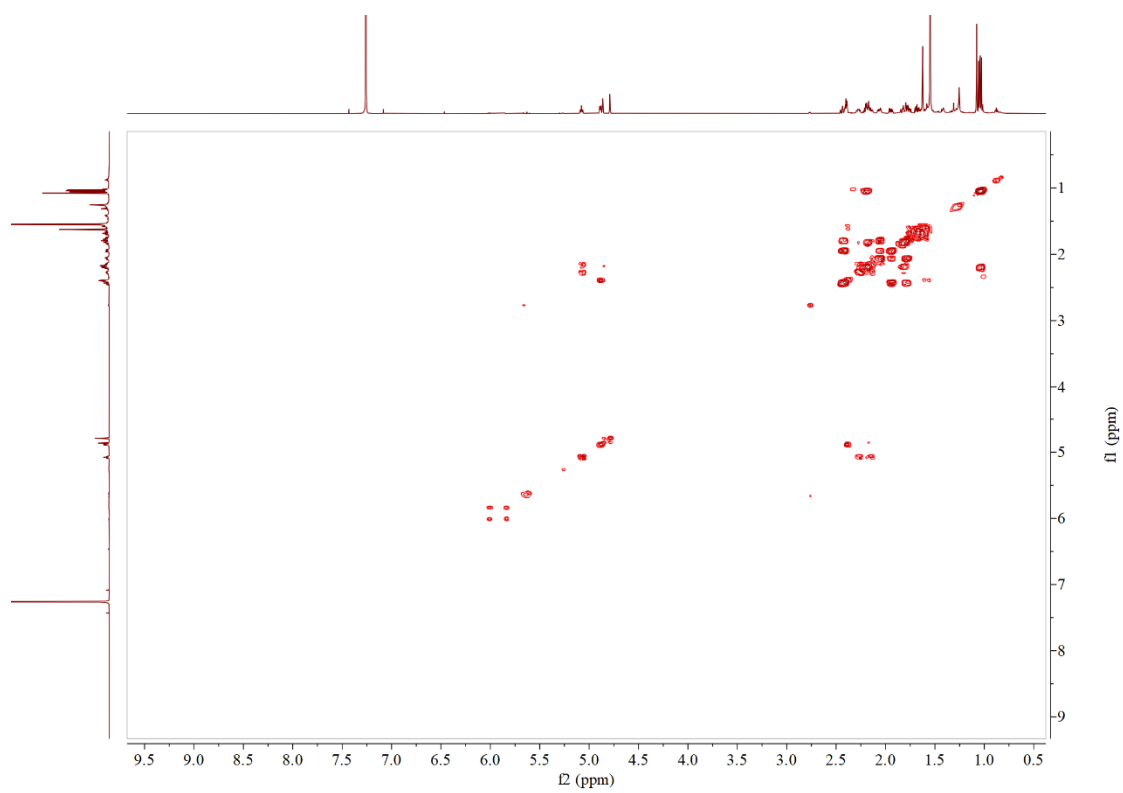

**Figure S40.** <sup>1</sup>H-<sup>1</sup>H COSY spectrum of **5** (600 MHz, CDCl<sub>3</sub>)

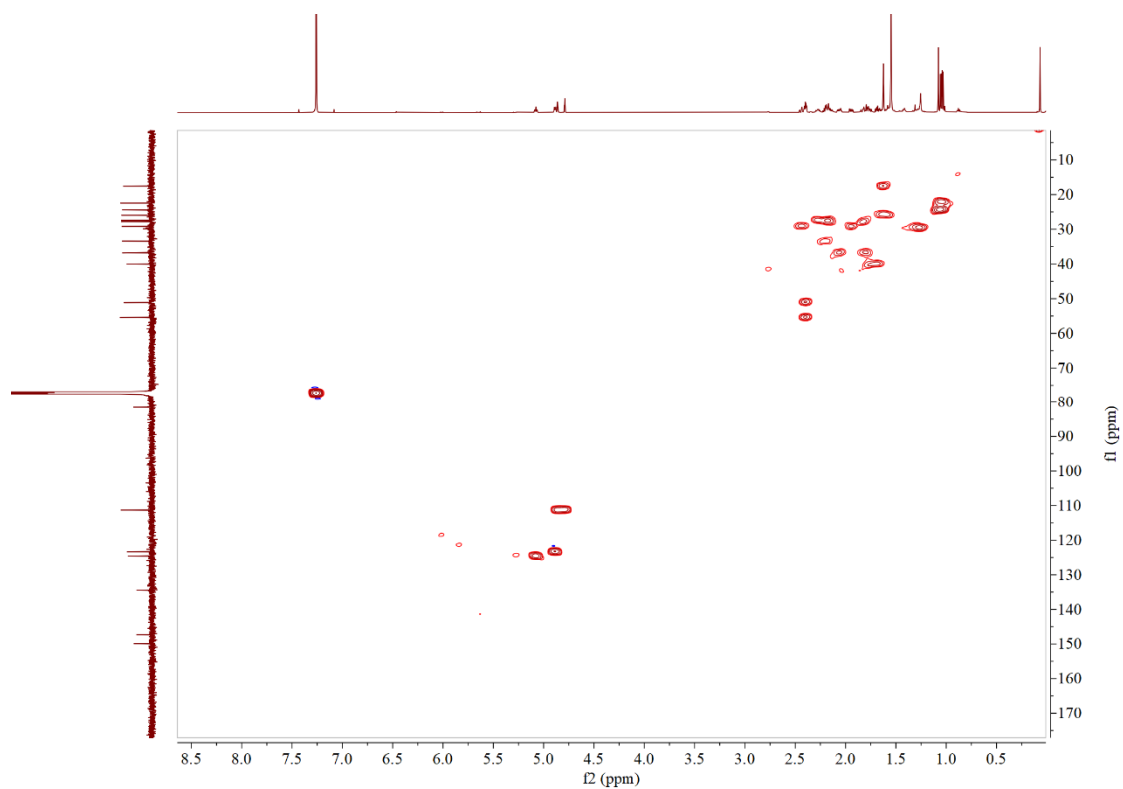

**Figure S41.** HSQC spectrum of **5** (600 MHz,  $\text{CDCl}_3$ )

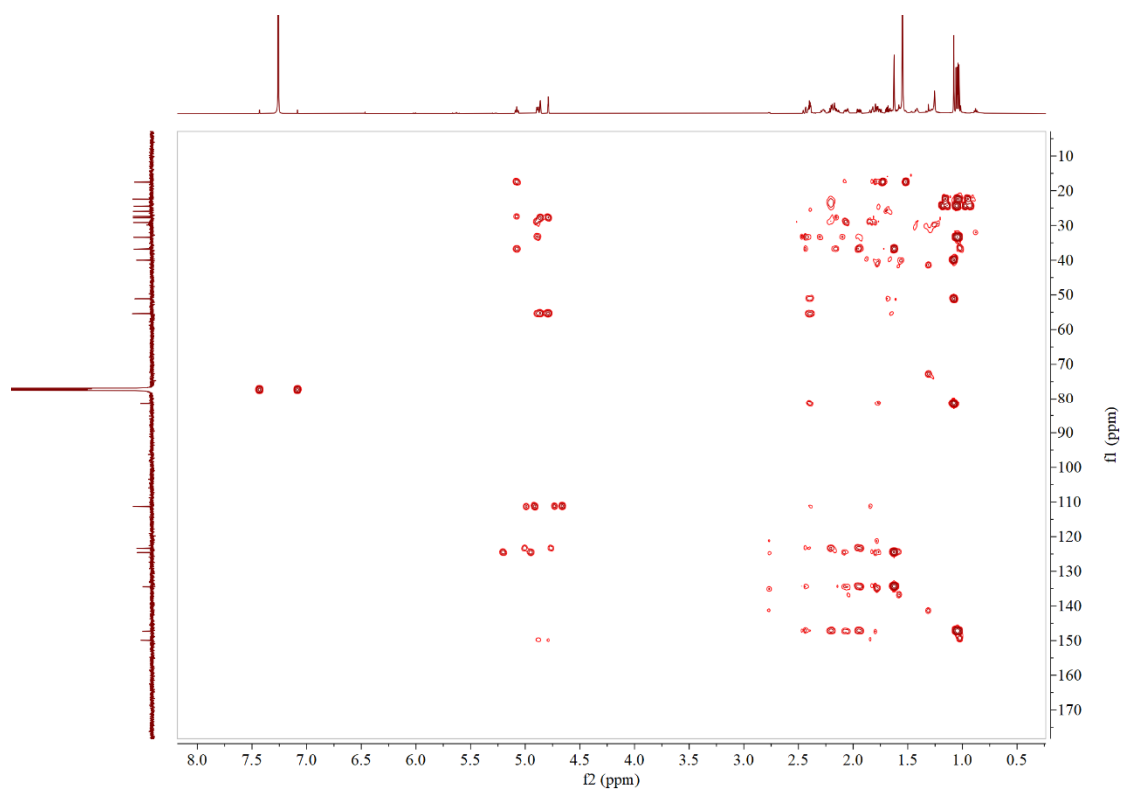

**Figure S42.** HMBC spectrum of **5** (600 MHz,  $\text{CDCl}_3$ )



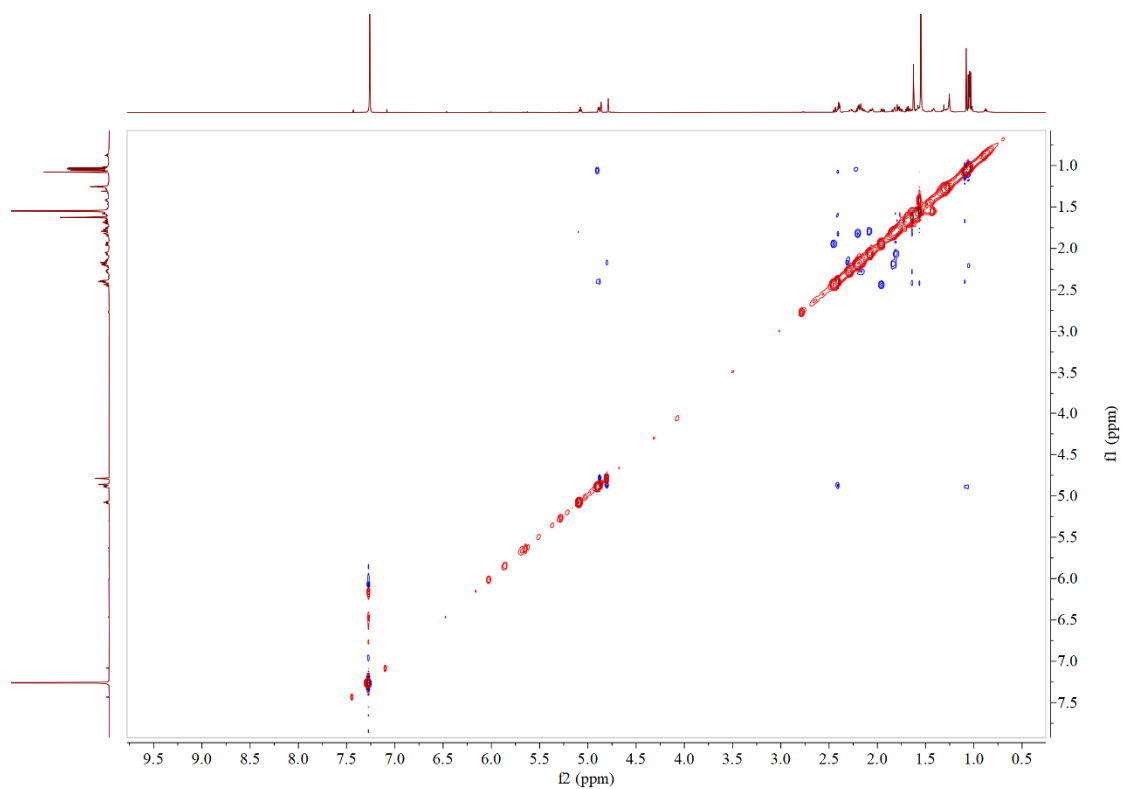

**Figure S43.** NOESY spectrum of **5** (600 MHz, CDCl<sub>3</sub>)

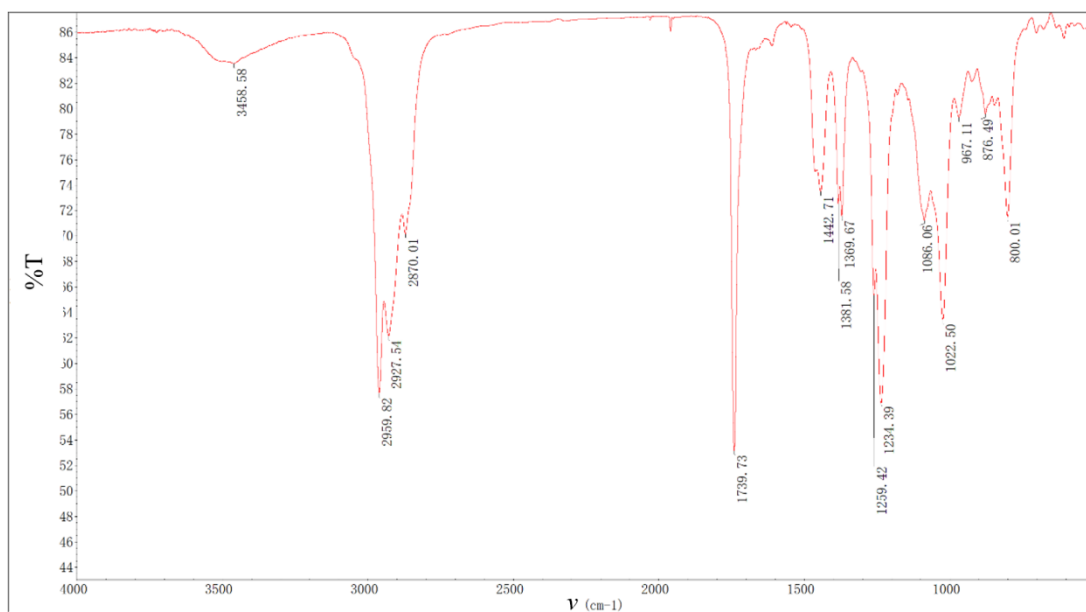

**Figure S44.** IR spectrum of **5**

EI202101071 A8-D5A2C3D4-4 -c1#9 RT: 1.86

T: + c EI Full ms [ 49.50-800.50]

m/z= 48-803

| m/z      | Intensity | Relative | Theo.<br>Mass | Delta<br>(mmu) | RDB<br>equiv. | Composition                                    |
|----------|-----------|----------|---------------|----------------|---------------|------------------------------------------------|
| 69.0694  | 3628504.0 | 57.83    | 69.0699       | -0.48          | 1.5           | C <sub>5</sub> H <sub>9</sub>                  |
| 93.0307  | 6274697.0 | 100.00   | 93.0335       | -2.76          | 4.5           | C <sub>6</sub> H <sub>5</sub> O <sub>1</sub>   |
| 94.0432  | 957975.0  | 15.27    | 94.0413       | 1.86           | 4.0           | C <sub>6</sub> H <sub>6</sub> O <sub>1</sub>   |
| 106.0436 | 1595572.0 | 25.43    | 106.0413      | 2.25           | 5.0           | C <sub>7</sub> H <sub>6</sub> O <sub>1</sub>   |
| 115.0150 | 499380.0  | 7.96     | 115.0178      | -2.83          | 7.5           | C <sub>8</sub> H <sub>3</sub> O <sub>1</sub>   |
| 119.0857 | 5229835.0 | 83.35    | 119.0855      | 0.18           | 4.5           | C <sub>9</sub> H <sub>11</sub>                 |
| 120.0962 | 1191436.0 | 18.99    | 120.0934      | 2.84           | 4.0           | C <sub>9</sub> H <sub>12</sub>                 |
| 131.0853 | 2099264.0 | 33.46    | 131.0855      | -0.18          | 5.5           | C <sub>10</sub> H <sub>11</sub>                |
| 132.0920 | 692026.0  | 11.03    | 132.0934      | -1.35          | 5.0           | C <sub>10</sub> H <sub>12</sub>                |
| 133.1009 | 3419703.0 | 54.50    | 133.1012      | -0.27          | 4.5           | C <sub>10</sub> H <sub>13</sub>                |
| 134.1082 | 1704048.0 | 27.16    | 134.1090      | -0.84          | 4.0           | C <sub>10</sub> H <sub>14</sub>                |
| 135.1163 | 2579477.0 | 41.11    | 135.1168      | -0.49          | 3.5           | C <sub>10</sub> H <sub>15</sub>                |
| 136.1240 | 1458241.0 | 23.24    | 136.1247      | -0.65          | 3.0           | C <sub>10</sub> H <sub>16</sub>                |
| 137.0960 | 395629.0  | 6.31     | 137.0961      | -0.07          | 3.5           | C <sub>9</sub> H <sub>13</sub> O <sub>1</sub>  |
| 137.1324 | 1104549.0 | 17.60    | 137.1325      | -0.07          | 2.5           | C <sub>10</sub> H <sub>17</sub>                |
| 143.0857 | 795009.0  | 12.67    | 143.0855      | 0.19           | 6.5           | C <sub>11</sub> H <sub>11</sub>                |
| 145.1010 | 2868491.0 | 45.72    | 145.1012      | -0.15          | 5.5           | C <sub>11</sub> H <sub>13</sub>                |
| 146.1074 | 963911.0  | 15.36    | 146.1090      | -1.65          | 5.0           | C <sub>11</sub> H <sub>14</sub>                |
| 147.1164 | 3879065.0 | 61.82    | 147.1168      | -0.38          | 4.5           | C <sub>11</sub> H <sub>15</sub>                |
| 148.1232 | 1232813.0 | 19.65    | 148.1247      | -1.44          | 4.0           | C <sub>11</sub> H <sub>16</sub>                |
| 149.1321 | 1695247.0 | 27.02    | 149.1325      | -0.35          | 3.5           | C <sub>11</sub> H <sub>17</sub>                |
| 150.1400 | 5003048.0 | 79.73    | 150.1403      | -0.33          | 3.0           | C <sub>11</sub> H <sub>18</sub>                |
| 157.1015 | 877289.0  | 13.98    | 157.1012      | 0.29           | 6.5           | C <sub>12</sub> H <sub>13</sub>                |
| 159.1144 | 2300180.0 | 36.66    | 159.1168      | -2.47          | 5.5           | C <sub>12</sub> H <sub>15</sub>                |
| 161.1300 | 1680451.0 | 26.78    | 161.1325      | -2.47          | 4.5           | C <sub>12</sub> H <sub>17</sub>                |
| 162.1380 | 1183344.0 | 18.86    | 162.1403      | -2.29          | 4.0           | C <sub>12</sub> H <sub>18</sub>                |
| 163.1457 | 1384555.0 | 22.07    | 163.1481      | -2.47          | 3.5           | C <sub>12</sub> H <sub>19</sub>                |
| 164.1553 | 585854.0  | 9.34     | 164.1560      | -0.63          | 3.0           | C <sub>12</sub> H <sub>20</sub>                |
| 171.1180 | 1045039.0 | 16.65    | 171.1168      | 1.15           | 6.5           | C <sub>13</sub> H <sub>15</sub>                |
| 173.1321 | 1152068.0 | 18.36    | 173.1325      | -0.38          | 5.5           | C <sub>13</sub> H <sub>17</sub>                |
| 174.1385 | 433255.0  | 6.90     | 174.1403      | -1.79          | 5.0           | C <sub>13</sub> H <sub>18</sub>                |
| 175.1477 | 925399.0  | 14.75    | 175.1481      | -0.43          | 4.5           | C <sub>13</sub> H <sub>19</sub>                |
| 177.1279 | 384613.0  | 6.13     | 177.1274      | 0.52           | 4.5           | C <sub>12</sub> H <sub>17</sub> O <sub>1</sub> |
| 185.1322 | 892351.0  | 14.22    | 185.1325      | -0.28          | 6.5           | C <sub>14</sub> H <sub>17</sub>                |
| 187.1477 | 4182551.0 | 66.66    | 187.1481      | -0.43          | 5.5           | C <sub>14</sub> H <sub>19</sub>                |
| 189.1278 | 385676.0  | 6.15     | 189.1274      | 0.40           | 5.5           | C <sub>13</sub> H <sub>17</sub> O <sub>1</sub> |
| 189.1628 | 804874.0  | 12.83    | 189.1638      | -1.01          | 4.5           | C <sub>14</sub> H <sub>21</sub>                |
| 199.1476 | 434672.0  | 6.93     | 199.1481      | -0.52          | 6.5           | C <sub>15</sub> H <sub>19</sub>                |
| 201.1632 | 578854.0  | 9.23     | 201.1638      | -0.61          | 5.5           | C <sub>15</sub> H <sub>21</sub>                |
| 202.1705 | 967219.0  | 15.41    | 202.1716      | -1.10          | 5.0           | C <sub>15</sub> H <sub>22</sub>                |
| 203.1796 | 1654107.0 | 26.36    | 203.1794      | 0.14           | 4.5           | C <sub>15</sub> H <sub>23</sub>                |
| 215.1782 | 714915.0  | 11.39    | 215.1794      | -1.19          | 5.5           | C <sub>16</sub> H <sub>23</sub>                |
| 217.1946 | 1083846.0 | 17.27    | 217.1951      | -0.51          | 4.5           | C <sub>16</sub> H <sub>25</sub>                |
| 227.1794 | 1617101.0 | 25.77    | 227.1794      | -0.01          | 6.5           | C <sub>17</sub> H <sub>23</sub>                |
| 230.2022 | 873007.0  | 13.91    | 230.2029      | -0.68          | 5.0           | C <sub>17</sub> H <sub>26</sub>                |

EI202101071\_A8-D5A2C3D4-4 -c1#9 RT: 1.86

T: + c EI Full ms [ 49.50-800.50]

m/z= 48-803

| m/z      | Intensity | Relative | Theo.<br>Mass | Delta<br>(mmu) | RDB<br>equiv. | Composition                                    |
|----------|-----------|----------|---------------|----------------|---------------|------------------------------------------------|
| 245.1905 | 1828265.0 | 29.14    | 245.1900      | 0.49           | 5.5           | C <sub>17</sub> H <sub>25</sub> O <sub>1</sub> |
| 255.2119 | 485174.0  | 7.73     | 255.2107      | 1.13           | 6.5           | C <sub>19</sub> H <sub>27</sub>                |
| 270.2332 | 553869.0  | 8.83     | 270.2342      | -1.05          | 6.0           | C <sub>20</sub> H <sub>30</sub>                |
| 288.2451 | 1056557.0 | 16.84    | 288.2448      | 0.34           | 5.0           | C <sub>20</sub> H <sub>32</sub> O <sub>1</sub> |

**Figure S45.** HREIMR spectrum of **5**

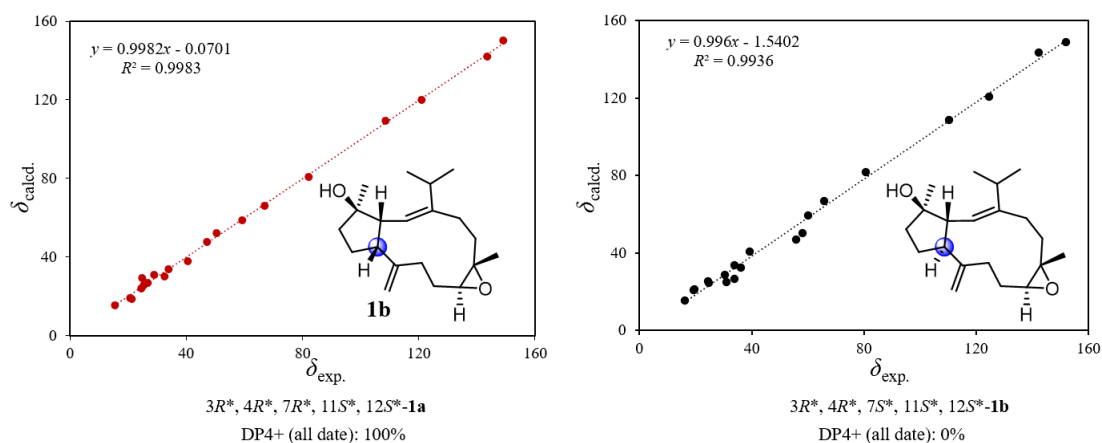

**Figure S46.** Regression analysis of experimental vs calculated  $^{13}\text{C}$  NMR chemical shifts of  $(3R^*, 4R^*, 7R^*, 11S^*, 12S^*)$ -**1a**,  $(3R^*, 4R^*, 7S^*, 11S^*, 12S^*)$ -**1b** at the PCM/mPW1PW91/6-31+G\*\* level using DP4+ method.

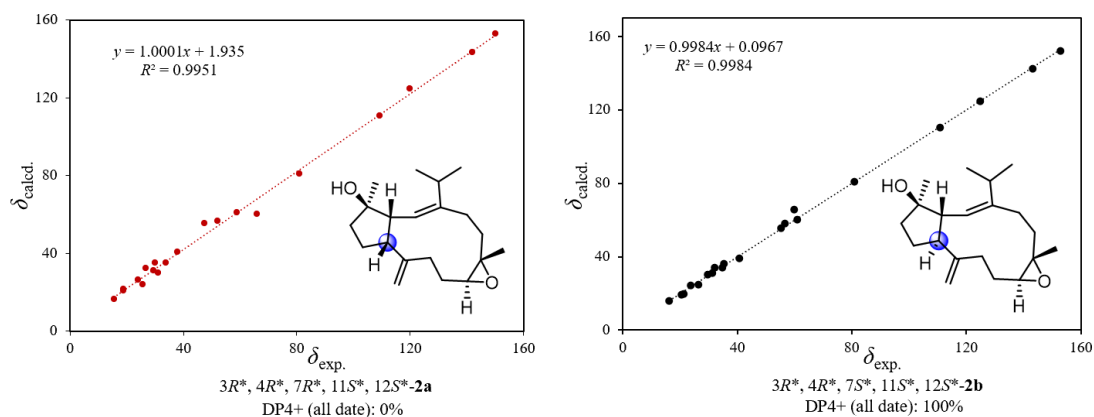

**Figure S47.** Regression analysis of experimental vs calculated  $^{13}\text{C}$  NMR chemical shifts of  $(3R^*, 4R^*, 7R^*, 11S^*, 12S^*)$ -**2a**,  $(3R^*, 4R^*, 7S^*, 11S^*, 12S^*)$ -**2b** at the PCM/mPW1PW91/6-31+G\*\* level using DP4+ method

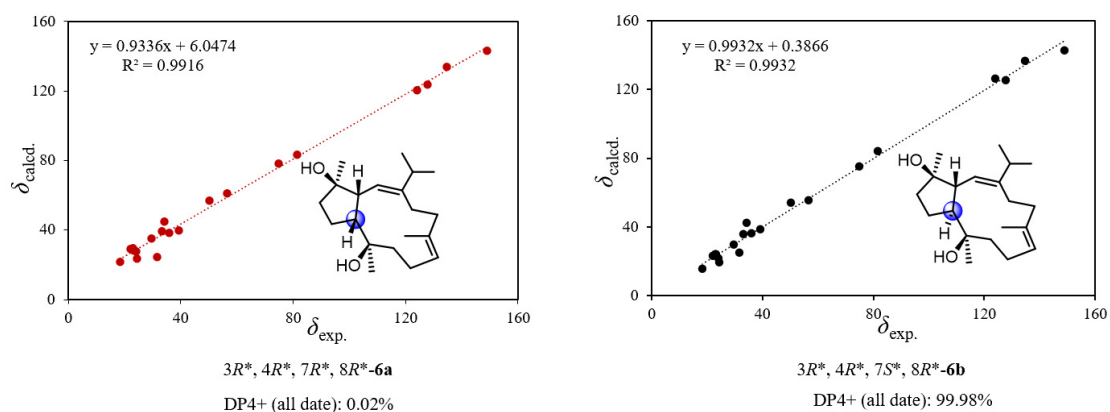

**Figure S48.** Regression analysis of experimental vs calculated  $^{13}\text{C}$  NMR chemical shifts of  $(3R^*, 4R^*, 7R^*, 8R^*)$ -**6a**,  $(3R^*, 4R^*, 7S^*, 8R^*)$ -**6b** at the PCM/mPW1PW91/6-31+G\*\* level using DP4+ method.

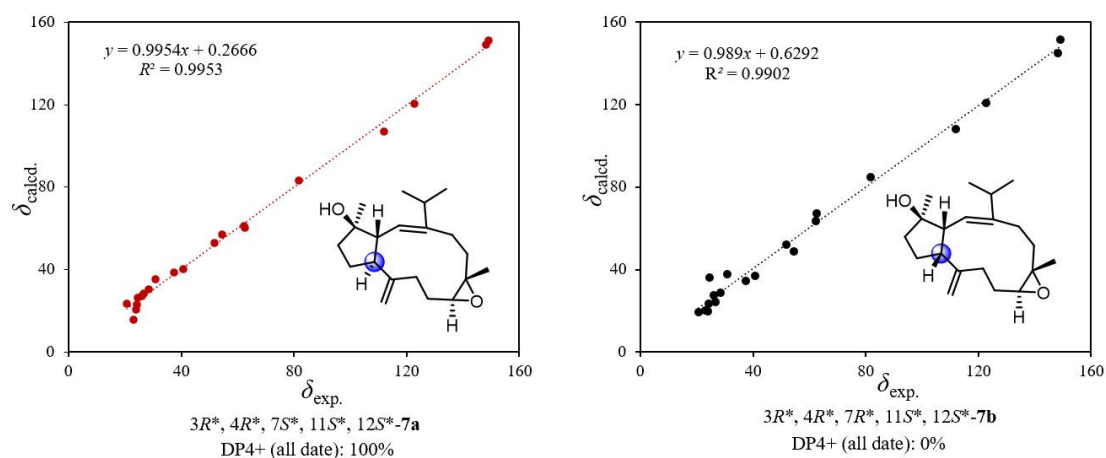

**Figure S49.** Regression analysis of experimental vs calculated  $^{13}\text{C}$  NMR chemical shifts of  $(3R^*, 4R^*, 7S^*, 11S^*, 12S^*)$ -**7a**,  $(3R^*, 4R^*, 7R^*, 11S^*, 12S^*)$ -**7b** at the PCM/mPW1PW91/6-31+G\*\* level using DP4+ method.

**Table S1** Crystal data and structure refinement for compound **1**

|                                             |                                                                |
|---------------------------------------------|----------------------------------------------------------------|
| Empirical formula                           | C <sub>20</sub> H <sub>32</sub> O <sub>2</sub>                 |
| Formula weight                              | 304.45                                                         |
| Temperature/K                               | 170                                                            |
| Crystal system                              | monoclinic                                                     |
| Space group                                 | P2 <sub>1</sub>                                                |
| a/Å                                         | 6.3207(2)                                                      |
| b/Å                                         | 16.7821(6)                                                     |
| c/Å                                         | 8.6966(3)                                                      |
| $\alpha$ /°                                 | 90                                                             |
| $\beta$ /°                                  | 101.226(2)                                                     |
| $\gamma$ /°                                 | 90                                                             |
| Volume/Å <sup>3</sup>                       | 904.84(5)                                                      |
| Z                                           | 2                                                              |
| $\rho_{\text{calc}}/\text{g}/\text{cm}^3$   | 1.117                                                          |
| $\mu/\text{mm}^{-1}$                        | 0.536                                                          |
| F(000)                                      | 336.0                                                          |
| Crystal size/mm <sup>3</sup>                | 0.15 × 0.08 × 0.05                                             |
| Radiation                                   | CuK $\alpha$ ( $\lambda$ = 1.54178)                            |
| 2 $\theta$ range for data collection/°      | 10.37 to 149.108                                               |
| Index ranges                                | -7 ≤ h ≤ 7, -20 ≤ k ≤ 20, -10 ≤ l ≤ 10                         |
| Reflections collected                       | 21562                                                          |
| Independent reflections                     | 3673 [ $R_{\text{int}}$ = 0.0440, $R_{\text{sigma}}$ = 0.0272] |
| Data/restraints/parameters                  | 3673/1/204                                                     |
| Goodness-of-fit on F <sup>2</sup>           | 1.047                                                          |
| Final R indexes [ $I \geq 2\sigma(I)$ ]     | $R_1$ = 0.0313, $wR_2$ = 0.0796                                |
| Final R indexes [all data]                  | $R_1$ = 0.0324, $wR_2$ = 0.0805                                |
| Largest diff. peak/hole / e Å <sup>-3</sup> | 0.14/-0.13                                                     |
| Flack parameter                             | -0.06(7)                                                       |
| Final R indexes [ $I \geq 2\sigma(I)$ ]     | $R_1$ = 0.0313, $wR_2$ = 0.0796                                |
| Final R indexes [all data]                  | $R_1$ = 0.0324, $wR_2$ = 0.0805                                |
| Largest diff. peak/hole / e Å <sup>-3</sup> | 0.14/-0.13                                                     |
